# Supplementary material for: Needs-based provision of medical care to nursing home residents: protocol for a mixed-methods study
Source: PubMed Central journal article supplement — BMJ Open. 2019 Aug 30;9(8):e025614. doi: 10.1136/bmjopen-2018-025614 (PMC6720143; doi:10.1136/bmjopen-2018-025614), 2019-08-30
Supplement: bmjopen-2018-025614.draft_revisions.pdf [file bmjopen-2018-025614.draft_revisions.pdf]

# BMJ Open

BMJ Open is committed to open peer review. As part of this commitment we make the peer review history of every article we publish publicly available.

When an article is published we post the peer reviewers' comments and the authors' responses online. We also post the versions of the paper that were used during peer review. These are the versions that the peer review comments apply to.

The versions of the paper that follow are the versions that were submitted during the peer review process. They are not the versions of record or the final published versions. They should not be cited or distributed as the published version of this manuscript.

BMJ Open is an open access journal and the full, final, typeset and author-corrected version of record of the manuscript is available on our site with no access controls, subscription charges or pay-per-view fees (<http://bmjopen.bmj.com>).

If you have any questions on BMJ Open's open peer review process please email [info.bmjopen@bmj.com](mailto:info.bmjopen@bmj.com)

# BMJ Open

## Needs-based provision of medical care to nursing home residents: protocol for a mixed-methods study

|                               |                                                                                                                                                                                                                                                                                                                                                                                                                                                                                                                                                                                                                                                                                                                                                                                                                                                                                                                                                                                                                                                                                                                                                                                                                                                                                                                                                                                                                                                                                                                                                                                                                                                                                                                                                                                                                                                                                                                                                                                                                                                                                                                                                                                                                                                                                                                                                                                                                                                    |
|-------------------------------|----------------------------------------------------------------------------------------------------------------------------------------------------------------------------------------------------------------------------------------------------------------------------------------------------------------------------------------------------------------------------------------------------------------------------------------------------------------------------------------------------------------------------------------------------------------------------------------------------------------------------------------------------------------------------------------------------------------------------------------------------------------------------------------------------------------------------------------------------------------------------------------------------------------------------------------------------------------------------------------------------------------------------------------------------------------------------------------------------------------------------------------------------------------------------------------------------------------------------------------------------------------------------------------------------------------------------------------------------------------------------------------------------------------------------------------------------------------------------------------------------------------------------------------------------------------------------------------------------------------------------------------------------------------------------------------------------------------------------------------------------------------------------------------------------------------------------------------------------------------------------------------------------------------------------------------------------------------------------------------------------------------------------------------------------------------------------------------------------------------------------------------------------------------------------------------------------------------------------------------------------------------------------------------------------------------------------------------------------------------------------------------------------------------------------------------------------|
| Journal:                      | <i>BMJ Open</i>                                                                                                                                                                                                                                                                                                                                                                                                                                                                                                                                                                                                                                                                                                                                                                                                                                                                                                                                                                                                                                                                                                                                                                                                                                                                                                                                                                                                                                                                                                                                                                                                                                                                                                                                                                                                                                                                                                                                                                                                                                                                                                                                                                                                                                                                                                                                                                                                                                    |
| Manuscript ID                 | bmjopen-2018-025614                                                                                                                                                                                                                                                                                                                                                                                                                                                                                                                                                                                                                                                                                                                                                                                                                                                                                                                                                                                                                                                                                                                                                                                                                                                                                                                                                                                                                                                                                                                                                                                                                                                                                                                                                                                                                                                                                                                                                                                                                                                                                                                                                                                                                                                                                                                                                                                                                                |
| Article Type:                 | Protocol                                                                                                                                                                                                                                                                                                                                                                                                                                                                                                                                                                                                                                                                                                                                                                                                                                                                                                                                                                                                                                                                                                                                                                                                                                                                                                                                                                                                                                                                                                                                                                                                                                                                                                                                                                                                                                                                                                                                                                                                                                                                                                                                                                                                                                                                                                                                                                                                                                           |
| Date Submitted by the Author: | 24-Jul-2018                                                                                                                                                                                                                                                                                                                                                                                                                                                                                                                                                                                                                                                                                                                                                                                                                                                                                                                                                                                                                                                                                                                                                                                                                                                                                                                                                                                                                                                                                                                                                                                                                                                                                                                                                                                                                                                                                                                                                                                                                                                                                                                                                                                                                                                                                                                                                                                                                                        |
| Complete List of Authors:     | <p>Czwikla, Jonas; University of Bremen, SOCIUM Research Center on Inequality and Social Policy, Department of Health, Long-term Care and Pensions; University of Bremen, High-Profile Area Health Sciences</p> <p>Schulz, M; University of Bremen, SOCIUM Research Center on Inequality and Social Policy, Department of Health, Long-term Care and Pensions; University of Bremen, High-Profile Area Health Sciences</p> <p>Heinze, Franziska; University of Bremen, SOCIUM Research Center on Inequality and Social Policy, Department of Health, Long-term Care and Pensions; University of Bremen, High-Profile Area Health Sciences</p> <p>Kalwitzki, Thomas; University of Bremen, SOCIUM Research Center on Inequality and Social Policy, Department of Health, Long-term Care and Pensions; University of Bremen, High-Profile Area Health Sciences</p> <p>Gand, Daniel; University of Bremen, Institute of Public Health and Nursing Research (IPP), Department for Health Services Research; University of Bremen, High-Profile Area Health Sciences</p> <p>Schmidt, Annika; University of Bremen, Institute of Public Health and Nursing Research (IPP), Department for Health Care Research; University of Bremen, High-Profile Area Health Sciences</p> <p>Tsiasioti, Chrysanthi; Research Institute of the Local Health Care Funds (WIdO)</p> <p>Schwinger, Antje; Research Institute of the Local Health Care Funds (WIdO)</p> <p>Kloep, Stephan; University of Bremen, Competence Center for Clinical Trials (KKSB); University of Bremen, High-Profile Area Health Sciences</p> <p>Schmiemann, Guido; University of Bremen, Institute of Public Health and Nursing Research (IPP), Department for Health Services Research; Hannover Medical School, Institute for General Practice</p> <p>Wolf-Ostermann, Karin; University of Bremen, Institute of Public Health and Nursing Research (IPP), Department for Health Care Research; University of Bremen, High-Profile Area Health Sciences</p> <p>Gerhardus, Ansgar; University of Bremen, Institute of Public Health and Nursing Research (IPP), Department for Health Services Research; University of Bremen, High-Profile Area Health Sciences</p> <p>Rothgang, Heinz; University of Bremen, SOCIUM Research Center on Inequality and Social Policy, Department of Health, Long-term Care and Pensions; University of Bremen, High-Profile Area Health Sciences, Bremen</p> |
| Keywords:                     | Medical care, Nursing homes, Needs assessment, Administrative claims, Health services research                                                                                                                                                                                                                                                                                                                                                                                                                                                                                                                                                                                                                                                                                                                                                                                                                                                                                                                                                                                                                                                                                                                                                                                                                                                                                                                                                                                                                                                                                                                                                                                                                                                                                                                                                                                                                                                                                                                                                                                                                                                                                                                                                                                                                                                                                                                                                     |
|                               |                                                                                                                                                                                                                                                                                                                                                                                                                                                                                                                                                                                                                                                                                                                                                                                                                                                                                                                                                                                                                                                                                                                                                                                                                                                                                                                                                                                                                                                                                                                                                                                                                                                                                                                                                                                                                                                                                                                                                                                                                                                                                                                                                                                                                                                                                                                                                                                                                                                    |

1  
2  
3  
4  
5  
6  
7  
8  
9  
10  
11  
12  
13  
14  
15  
16  
17  
18  
19  
20  
21  
22  
23  
24  
25  
26  
27  
28  
29  
30  
31  
32  
33  
34  
35  
36  
37  
38  
39  
40  
41  
42  
43  
44  
45  
46  
47  
48  
49  
50  
51  
52  
53  
54  
55  
56  
57  
58  
59  
60

SCHOLARONE™  
Manuscripts

For peer review only

1 **Needs-based provision of medical care to nursing home residents: protocol for a**  
2 **mixed-methods study**

3 Jonas Czwikla<sup>1,7</sup>, Maike Schulz<sup>1,7</sup>, Franziska Heinze<sup>1,7</sup>, Thomas Kalwitzki<sup>1,7</sup>, Daniel Gand<sup>2,7</sup>,  
4 Annika Schmidt<sup>3,7</sup>, Chrysanthi Tsiasioti<sup>4</sup>, Antje Schwinger<sup>4</sup>, Stephan Kloep<sup>5,7</sup>, Guido  
5 Schmiemann<sup>2,6,7</sup>, Karin Wolf-Ostermann<sup>3,7</sup>, Ansgar Gerhardus<sup>2,7</sup>, Heinz Rothgang<sup>1,7</sup>

6 <sup>1</sup> University of Bremen, SOCIUM Research Center on Inequality and Social Policy,  
7 Department of Health, Long-term Care and Pensions, Mary-Somerville-Straße 5, 28359  
8 Bremen, Germany

9 <sup>2</sup> University of Bremen, Institute of Public Health and Nursing Research (IPP), Department  
10 for Health Services Research, Grazer Straße 4, 28359 Bremen, Germany

11 <sup>3</sup> University of Bremen, Institute of Public Health and Nursing Research (IPP), Department  
12 for Health Care Research, Grazer Straße 4, 28359 Bremen, Germany

13 <sup>4</sup> Research Institute of the Local Health Care Funds (WIdO), Rosenthaler Str. 31, 10178  
14 Berlin, Germany

15 <sup>5</sup> University of Bremen, Competence Center for Clinical Trials (KKSb), Linzer Straße 4,  
16 28359 Bremen, Germany

17 <sup>6</sup> Hannover Medical School, Institute for General Practice, Carl-Neuberg-Str. 1, 30625  
18 Hannover, Germany

19 <sup>7</sup> University of Bremen, High-Profile Area Health Sciences, Bremen, Germany

20  
21 **Corresponding author:**

22 Jonas Czwikla, M.A. (czwikla@uni-bremen.de)

23 University of Bremen, SOCIUM Research Center on Inequality and Social Policy

24 Mary-Somerville-Straße 5, 28359 Bremen, Germany

25 Phone: +49 (0)421 218 58633

1  
2  
3 26 **Co-authors:**

4  
5 27 Dr. Maike Schulz (maike.schulz@uni-bremen.de)

6  
7 28 Franziska Heinze, M.Sc. (fheinze@uni-bremen.de)

8  
9 29 Dipl.-Geront. Thomas Kalwitzki (thomas.kalwitzki@uni-bremen.de)

10  
11 30 Daniel Gand, M.A. (daniel.gand@uni-bremen.de)

12  
13 31 Annika Schmidt, M.Sc. (schmidt.annika@uni-bremen.de)

14  
15 32 Chrysanthi Tsiasioti (Chrysanthi.Tsiasioti@wido.bv.aok.de)

16  
17 33 Dr. Antje Schwinger (antje.schwinger@wido.bv.aok.de)

18  
19 34 Dr. Stephan Kloep (kloep@math.uni-bremen.de)

20  
21 35 PD Dr. Guido Schmiemann (schmiema@uni-bremen.de)

22  
23 36 Prof. Dr. Karin Wolf-Ostermann (wolf-ostermann@uni-bremen.de)

24  
25 37 Prof. Dr. Ansgar Gerhardus (ansgar.gerhardus@uni-bremen.de)

26  
27 38 Prof. Dr. Heinz Rothgang (rothgang@uni-bremen.de)

28  
29 39

30  
31  
32  
33 40 **Word count:** 2.032

34  
35 41

36  
37 42

38  
39 43

40  
41 44

42  
43 45

44  
45 46

46  
47 47

48  
49 48

50  
51 49

52  
53 50

54  
55 51

1  
2  
3 52 **Abstract**  
4

5 53 **Introduction** Nursing home residents typically have greater needs for medical care than  
6  
7 54 community-dwelling elderly. However, restricted cognitive abilities and limited mobility may  
8  
9 55 impede their access to GPs and medical specialists. The provision of medical care in nursing  
10  
11 56 homes may therefore be inappropriate in some areas of medical care. The purpose of this  
12  
13 57 mixed-methods study is to systematically assess, evaluate and explain met and unmet medical  
14  
15 58 care needs in German nursing homes and to develop solutions where medical care is found to  
16  
17 59 be inappropriate.  
18  
19

20 60 **Methods and analysis** First, Statutory Health Insurance claims data are analyzed to identify  
21  
22 61 differences in the utilization of medical care between nursing home residents and community-  
23  
24 62 dwelling elderly with and without need for long-term care. Second, the health status and  
25  
26 63 medical care of 500 nursing home residents are assessed and evaluated to quantify met and  
27  
28 64 unmet medical care needs. Third, qualitative expert interviews and case conferences and,  
29  
30 65 fourth, quantitative analyses of linked data are used to provide structural, case-specific and  
31  
32 66 generalizable explanations of inappropriate medical care among nursing home residents.  
33  
34 67 Fifth, a modified Delphi study is employed to develop pilot projects aiming to improve  
35  
36 68 medical care in nursing homes.  
37  
38

39 69 **Ethics and dissemination** This study was approved by the Ethics Committee of the  
40  
41 70 University of Bremen. Research findings are disseminated through presentations at national  
42  
43 71 and international conferences and publications in peer-reviewed scientific journals.  
44  
45

46 72 **Trial registration number** DRKS00012383  
47  
48 73  
49  
50 74  
51  
52 75  
53  
54 76  
55  
56 77  
57  
58  
59  
60

1  
2  
3  
4  
5  
6  
7  
8  
9  
10  
11  
12  
13  
14  
15  
16  
17  
18  
19  
20  
21  
22  
23  
24  
25  
26  
27  
28  
29  
30  
31  
32  
33  
34  
35  
36  
37  
38  
39  
40  
41  
42  
43  
44  
45  
46  
47  
48  
49  
50  
51  
52  
53  
54  
55  
56  
57  
58  
59  
60

## 78 **Article Summary**

### 79 **Strengths and limitations of this study**

- 80 • Based on longitudinal Statutory Health Insurance claims data, cross-sectional data  
81 collected in nursing homes, expert interviews and case conferences the provision of  
82 medical care is analyzed for the first time in relation to individual medical care needs  
83 among nursing home residents in Germany.
- 84 • The mixed-methods designs allows a comprehensive assessment, evaluation and  
85 explanation of met and unmet medical care needs in nursing homes.
- 86 • Participatory approaches involving GPs, medical specialists, nursing home staff,  
87 Statutory Health Insurance employees, nursing home residents and relatives are used  
88 to increase the acceptance and effectiveness of pilot projects to be developed to  
89 improve medical care where it is found to be inappropriate.
- 90 • Differences in the willingness to participate among nursing homes and nursing home  
91 residents may result in a selective study population.
- 92 • Focusing on nursing homes located in the federal state of Bremen and members of one  
93 local Statutory Health Insurance fund may limit the generalizability of the study  
94 results.

95

96

97

98

99

100

101

102

## 103 **Introduction**

104 Nursing home residents may not receive appropriate medical care since restricted cognitive  
105 abilities and limited mobility may impede their access to GPs and medical specialists<sup>1-3</sup>.

106 Moreover, nursing home residents typically suffer from multimorbidity, frailty, cognitive  
107 impairments and polypharmacy, resulting in diverse medical care needs that compound the  
108 challenge of providing appropriate medical care<sup>4-7</sup>.

109 Empirical studies support this view, indicating inappropriate medical care provision in  
110 nursing homes for the treatment of visual and hearing impairments<sup>8-10</sup>, oral health care<sup>1 2 11</sup>  
111 <sup>12</sup>, pain treatment<sup>13</sup> and drug prescriptions<sup>2 14-17</sup>. Atramont et al., furthermore, found nursing  
112 home admission to be negatively associated with some forms of outpatient care<sup>18</sup> and  
113 positively associated with psychotropic and antibacterial drug use<sup>19</sup>.

114 There is, however, hardly any empirical evidence on explanations of inappropriate medical  
115 care provision in nursing homes. In this regard, a health technology assessment report  
116 concluded that there is not sufficient data available to allow recommendations to be drawn on  
117 how medical care provision in German nursing homes can be improved<sup>2</sup>.

118 Given this lack of evidence, the proposed research project aims to systematically assess,  
119 evaluate and explain met and unmet medical care needs in German nursing homes and to  
120 develop solutions where medical care is found to be inappropriate. The specific aims are: (1)  
121 to identify differences in the utilization of medical care between a) nursing home residents, b)  
122 community-dwelling elderly in need for long-term care and c) community-dwelling elderly  
123 without need for long-term care; (2) to quantify met and unmet medical care needs of nursing  
124 home residents; (3) to provide structural and case-specific explanations of inappropriate  
125 medical care provision in nursing homes; (4) to provide explanations of inappropriate medical  
126 care provision that are generalizable to the total population of nursing home residents; and (5)  
127 to develop pilot projects aiming to improve medical care provision in nursing homes.



## 128 **Methods and analysis**

129 This mixed-methods study is running from April 1, 2017 to March 31, 2020. It is structured  
130 into five steps (figure 1). In step 1, Statutory Health Insurance (SHI) claims data are analyzed  
131 in order to identify differences in the utilization of medical care between nursing home  
132 residents and community-dwelling elderly with and without the need for long-term care. Such  
133 differences in the utilization of medical care may indicate, but not prove, inappropriate  
134 medical care provision in nursing homes. Thus, in step 2, nursing home residents' health  
135 status and utilization of medical care are assessed and evaluated to quantify met and unmet  
136 medical care needs with respect to vision, hearing, oral health and Parkinson's disease. In  
137 steps 3 and 4, qualitative expert interviews and case conferences as well as quantitative  
138 methods are used to provide structural, case-specific and generalizable explanations of  
139 inappropriate medical care in nursing homes. In step 5, a modified Delphi study is used to  
140 generate ideas on how to improve the provision of medical care in nursing homes.  
141 Consequently, at least two pilot projects are developed and implemented in one nursing home  
142 to test for practicability. In the following sections, each step is described in detail.

143

### 144 **Step 1: Analysis of SHI claims data**

145 SHI claims data from AOK Bremen/Bremerhaven, a local SHI fund, are analyzed to identify  
146 differences in the utilization of medical care that indicate inappropriate medical care provision  
147 in German nursing homes. The available data comprise information on sex, age, in- and  
148 outpatient care as well as on long-term care use. All diagnoses are coded according to the  
149 German Modification of the International Classification of Diseases, 10th Revision (ICD-10-  
150 GM) and can be differentiated according to GPs and medical specialties in the outpatient  
151 setting.

1  
2  
3 152 From 245,000 insured persons, a subsample of 68,718 insured persons aged 60 years and over  
4  
5 153 is drawn. For this subsample, the morbidity status of each insured person is defined by 31  
6  
7 154 disease categories related to at least one of 13 examined medical specialties (table 1).  
8

9 155

11 156 **Table 1 Disease categories and related medical specialties used to define the individual**  
12  
13 157 **morbidity status of insured persons examined in step 1**

| No. | Disease categories                                                                                  | ICD-10-GM 2015 codes        | Related medical specialties*            |
|-----|-----------------------------------------------------------------------------------------------------|-----------------------------|-----------------------------------------|
| 01  | Hypertensive diseases                                                                               | I10-I15                     | Internal medicine, cardiology           |
| 02  | Ischemic heart diseases                                                                             | I20-I52                     | Internal medicine, cardiology           |
| 03  | Metabolic disorders                                                                                 | E70-E90                     | Internal medicine                       |
| 04  | Arthropathies                                                                                       | M00-M25                     | Internal medicine, orthopedics          |
| 05  | Diabetes mellitus                                                                                   | E10-E14                     | Internal medicine                       |
| 06  | Dorsopathies                                                                                        | M40-M54                     | Orthopedics                             |
| 07  | Disorders of thyroid gland                                                                          | E00-E07                     | Internal medicine                       |
| 08  | Vascular diseases                                                                                   | I70-I89                     | Internal medicine, cardiology           |
| 09  | Organic, including symptomatic, mental disorders; other degenerative diseases of the nervous system | F00-F09; G30-G32            | Neurology/psychiatry                    |
| 10  | Diseases of esophagus, stomach and duodenum; hernia; other diseases of intestines                   | K20-K31; K40-K46; K55-K64   | Internal medicine                       |
| 11  | Chronic lower respiratory diseases                                                                  | J40-J47                     | Internal medicine, pulmonology          |
| 12  | Mood (affective) disorders                                                                          | F30-F39                     | Neurology/psychiatry                    |
| 13  | Cerebrovascular diseases                                                                            | I60-I69                     | Internal medicine, neurology/psychiatry |
| 14  | Neurotic, stress-related and somatoform disorders                                                   | F40-F48                     | Neurology/psychiatry                    |
| 15  | Symptoms and signs involving the urinary system; other diseases of urinary system                   | R30-R39; N30-N39            | Gynecology, urology                     |
| 16  | Diseases of the eye and adnexa                                                                      | H00-H59                     | Ophthalmology                           |
| 17  | Renal failure                                                                                       | N17-N19                     | Internal medicine, nephrology           |
| 18  | Osteopathies and chondropathies                                                                     | M80-M94                     | Orthopedics                             |
| 19  | Diseases of the ear and mastoid process                                                             | H60-H95                     | Otorhinolaryngology                     |
| 20  | Mononeuropathies; polyneuropathies and other disorders of the peripheral nervous system             | G56; G57; G58; G59; G60-G64 | Internal medicine, neurology/psychiatry |
| 21  | Diseases of male genital organs                                                                     | N40-N51                     | Urology                                 |
| 22  | Dermatitis, eczema, melanoma and other malignant neoplasms of skin                                  | L20-L30; C43-C44            | Dermatology, surgery                    |
| 23  | Noninflammatory disorders of female genital tract                                                   | N80-N98                     | Gynecology                              |
| 24  | Other disorders of the skin and subcutaneous tissue                                                 | L80-L99                     | Dermatology                             |
| 25  | Extrapyramidal and movement disorders                                                               | G20-G26                     | Internal medicine, neurology/psychiatry |
| 26  | Mental and behavioral disorders due to psychoactive substance use                                   | F10-F19                     | Neurology/psychiatry                    |
| 27  | Cerebral palsy and other paralytic syndromes                                                        | G80-G83                     | Internal medicine, neurology/psychiatry |
| 28  | Obesity and other hyperalimentation; Malnutrition                                                   | E65-E68; E40-E46            | Internal medicine                       |
| 29  | Schizophrenia, schizotypal and delusional disorders; disorders of adult personality and behavior    | F20-F29; F60-F69            | Neurology/psychiatry                    |
| 30  | Functional impairments                                                                              | U50-U52                     | Internal medicine, Orthopedics          |

|    |          |                                                                                                            |                      |
|----|----------|------------------------------------------------------------------------------------------------------------|----------------------|
| 31 | Injuries | S00-S09; S10-S19; S20-S29;<br>S30-S39; S40-S49; S50-S59;<br>S60-S69; S70-S79; S80-S89;<br>S90-S99; T08-T14 | Orthopedics, surgery |
|----|----------|------------------------------------------------------------------------------------------------------------|----------------------|

158 \*Due to the availability of data, dentistry had to be analyzed separately and is therefore not presented.

159

160 Zero-inflated poisson regression analyses as well as linear and logistic regression analyses are  
161 conducted to investigate the resulting 45 combinations of disease categories and related  
162 medical specialties separately. Each regression model includes only those insured persons  
163 who are diagnosed in the examined disease category. The dependent variable is the number of  
164 outpatient visits in the related medical specialty in 2015. Independent variables are the  
165 remaining 30 disease categories, age, sex, region, death, care setting and dummy variables as  
166 a combination of the obtained level of care and the care setting.

167

## 168 **Step 2: Assessment of nursing home residents**

169 The standardized assessment focuses on vision, hearing, oral health and Parkinson's disease.

170 It consists of two parts: First, the individual health status and medical care provision of 500

171 nursing home residents are assessed. Second, the provision of medical care is evaluated for

172 each resident to determine met and unmet medical care needs.

173 Residents are eligible for assessment if a) they are in need for long-term care, b) are aged 60

174 and over, c) have been residing in a nursing home located in the federal state of Bremen for at

175 least 12 months and d) are a member of the AOK Bremen/Bremerhaven. Eligible residents (or

176 their legal guardians) are recruited by the participating nursing homes and approached for

177 informed consent.

178 The standardized assessment is carried out by trained study nurses and includes: (1)

179 examinations of residents, (2) self-assessments by residents, (3) proxy-assessments by

180 residents' care nurses and (4) reviews of medical charts (table 2).

181

**Table 2 Instruments used to assess cross-sectional data in step 2**

| Category                        | Instrument                                                                                                                                                                                                      | Source* |   |   |   |
|---------------------------------|-----------------------------------------------------------------------------------------------------------------------------------------------------------------------------------------------------------------|---------|---|---|---|
|                                 |                                                                                                                                                                                                                 | E       | S | P | R |
| <b>Area of medical care</b>     |                                                                                                                                                                                                                 |         |   |   |   |
| Vision                          | Visual test <sup>25</sup>                                                                                                                                                                                       | X       |   |   |   |
|                                 | Questionnaire for individual rating of vision and use of visual aids                                                                                                                                            |         | X | X |   |
| Hearing                         | Chart review for vision-related diagnoses (e.g. age-related macular degeneration, cataract) and relevant comorbidities (e.g. diabetes mellitus)                                                                 |         |   |   | X |
|                                 | Whispered voice test <sup>26</sup>                                                                                                                                                                              | X       |   |   |   |
|                                 | Questionnaire for individual rating of hearing and use of hearing devices                                                                                                                                       |         | X | X |   |
| Oral health                     | Chart review for hearing-related diagnoses (e.g. presbycusis)                                                                                                                                                   |         |   |   | X |
|                                 | Oral Health Assessment Tool (OHAT) <sup>27</sup> and Oral Health Impact Profile (OHIP) <sup>28</sup>                                                                                                            | X       |   |   |   |
|                                 | Questionnaire for individual rating of dental problems as well as availability and use of dentures                                                                                                              |         | X | X |   |
| Parkinson's disease             | Chart review for oral health-related diagnoses (e.g. gingivitis)                                                                                                                                                |         |   |   | X |
|                                 | Chart review for diagnosis of Parkinson's disease, prescribed medications and contacts to medical specialists (e.g. neurologists) and/or therapists (e.g. physiotherapists)                                     |         |   |   | X |
| <b>General health status</b>    |                                                                                                                                                                                                                 |         |   |   |   |
| Health-related quality of life  | Short-Form Health Survey (SF-12) <sup>29</sup>                                                                                                                                                                  |         | X | X |   |
| Depression                      | Geriatric Depression Scale (GDS) <sup>30 31</sup>                                                                                                                                                               |         | X |   |   |
|                                 | Cornell Scale for Depression in Dementia (CSDD) <sup>32</sup>                                                                                                                                                   |         |   |   | X |
| Functional and cognitive status | Mini-Mental State Examination <sup>33</sup>                                                                                                                                                                     |         | X |   |   |
|                                 | Extended Barthel-Index <sup>34</sup>                                                                                                                                                                            |         |   |   | X |
| Nutrition                       | Mini-Nutritional Assessment Short Form (MNA-SF) <sup>35-38</sup>                                                                                                                                                |         |   |   | X |
| Vital signs                     | Chart review for vital signs and falls                                                                                                                                                                          |         |   |   | X |
| Level of care                   | Chart review for level of care                                                                                                                                                                                  |         |   |   | X |
| <b>Additional data</b>          |                                                                                                                                                                                                                 |         |   |   |   |
| Utilization of medical care     | Questionnaire and chart review for diagnoses, prescriptions of medication and aids, contacts to and organization of general and specialized care, hospitalization, contacts to duty doctors and emergency calls |         | X | X |   |
| Sociodemographic data           | Questionnaire and chart review for age, sex, education, marital status, migrant status and relatives                                                                                                            |         | X | X |   |
| Nursing home characteristics    | Questionnaire** for size, number of employees and residents, location-related information                                                                                                                       |         |   |   | X |

\*E = examinations of residents; S = self-assessed by residents; P = proxy-assessed by residents' care nurses; R = reviewed in medical charts

\*\* This questionnaire is completed by administrative employees of the respective nursing home.

1  
2  
3 188 Additionally, health-related aspects (e.g. quality of life and depression) are assessed as well as  
4  
5 189 structural factors relating to the participating nursing homes (e.g. numbers of employees and  
6  
7 190 residents) that may act as explanatory variables of medical care.

8  
9 191 Based on these data, a geriatrician, a GP and where necessary a medical specialist of the  
10  
11 192 corresponding field (i.e. an ophthalmologist, an ENT specialist, a dentist or a neurologist)  
12  
13 193 determine case by case whether or not medical care needs are met.

14  
15  
16 194

### 17 18 195 **Step 3: Expert interviews and case conferences**

19  
20 196 Semi-structured expert interviews and case conferences are used to identify structural and  
21  
22 197 case-specific explanations of inappropriate medical care provision in nursing homes. Expert  
23  
24 198 interviews are conducted with nursing home staff, physicians, people in need for long-term  
25  
26 199 care and informal caregivers who provide informed consent. The number of interviews is  
27  
28 200 determined by the principal of theoretical saturation. All interviews are recorded on tape,  
29  
30 201 transcribed and analyzed using content analysis<sup>20</sup>. The results provide a framework for the  
31  
32 202 subsequent case conferences, which are conducted for a selected subsample of nursing home  
33  
34 203 residents assessed in step 2.

35  
36  
37 204 The case conferences are held with the consenting nurses and, where necessary, the  
38  
39 205 consenting physicians and other health professionals involved in the provision of nursing and  
40  
41 206 medical care of the respective resident. Twenty residents with appropriate medical care and  
42  
43 207 twenty residents with inappropriate medical care are randomly selected for each field of  
44  
45 208 medical care (i.e. vision, hearing, oral health and Parkinson's disease). The case conferences  
46  
47 209 are based on a summarized presentation of the health status and medical care provision of the  
48  
49 210 respective resident. Using problem-centered group interviews<sup>21</sup>, the conference members  
50  
51 211 then discuss, case by case, factors that foster or inhibit the provision of needs-based medical  
52  
53 212 care.

54  
55  
56  
57 213

#### 214 **Step 4: Analysis of linked data, non-response analysis and extrapolation**

215 In step 4, primary data assessed in step 2 and SHI claims data covering the years 2014-2018  
216 are linked at the individual level. The linked data are analyzed to identify generalizable  
217 factors that impact the provision of medical care:

218 First, retrospective and prospective regression analyses are conducted. Retrospective analyses  
219 are used to identify factors in the utilization of medical care that impact the quantified met  
220 and unmet medical care needs of nursing home residents. Prospective analyses are used to  
221 investigate the impact of the standardized assessment conducted in step 2 on the utilization of  
222 medical care.

223 Next, a non-response analysis is conducted. SHI claims data of 1,500 residents are analyzed to  
224 identify systematic differences between responders and non-responders (e.g. in the  
225 distribution of age, sex, morbidity and long-term care level as well as in the duration of stay in  
226 long-term care and nursing homes).

227 Third, prevalence of met and unmet medical care needs is extrapolated. Findings are projected  
228 to a) all nursing home residents insured by the AOK Bremen/Bremerhaven, b) all nursing  
229 home residents of the federal state of Bremen and c) all nursing home residents of Germany.

230

#### 231 **Step 5: Modified Delphi study and pilot projects**

232 Based on the factors identified that may explain inappropriate medical care in steps 3 and 4, a  
233 modified Delphi study is then carried out. The technique is used with stakeholders from the  
234 fields of nursing and medical care and comprises three rounds. The first round is based on  
235 face-to-face focus group discussions, while the second and third rounds each consist of semi-  
236 structured online surveys. Each survey takes about 20 minutes to complete and is online for  
237 up to 2 weeks.

238 In the first round, a convenience sample of homogeneous and heterogeneous focus groups of  
239 consenting stakeholders (i.e., nursing home staff, GPs, medical specialist, SHI employees,

1  
2  
3 240 nursing home residents and relatives) generate ideas on how medical care provision to nursing  
4  
5 241 home residents can be improved. The focus groups are led by experienced project researchers,  
6  
7 242 who feed the results of steps 3 and 4 into the discussions. Based on the ideas generated, the  
8  
9 243 project researchers draft at least two pilot projects.

10  
11 244 In the second round, the experts are given descriptions of these potential pilot projects and  
12  
13 245 rate them with respect to their feasibility and effectiveness for improving medical care of  
14  
15 246 nursing home residents. These ratings are summarized and distributed back to all experts.  
16  
17 247 In the third round, the experts re-rate the projects based on the rating results from the previous  
18  
19 248 round. This is expected to result in a more consensual decision. Taking the results of this last  
20  
21 249 round into account, the concept of the pilot projects is revised and implemented in one  
22  
23 250 nursing home to test for practicability. A systematic evaluation of the pilot projects is planned  
24  
25 251 in a follow-up study.  
26  
27  
28  
29

## 30 252

### 31 253 **Discussion**

32  
33 254 This mixed-methods study broadens the limited evidence on the needs-based provision of  
34  
35 255 medical care in nursing homes. It systematically assesses, evaluates and explains met and  
36  
37 256 unmet medical care needs in nursing homes and takes first steps toward improvement.  
38  
39 257 Up to now, several studies have described differences in the utilization of medical care  
40  
41 258 between nursing home residents and community-dwelling elderly with and without need for  
42  
43 259 long-term care<sup>2 22-24</sup>. None of these, however, has evaluated whether such differences reflect  
44  
45 260 unmet medical care needs at the individual. Neither have differences in the utilization of  
46  
47 261 medical care been explained by prevailing structures that may be changed.  
48  
49 262 The present mixed-methods study addresses this evidence gap: Based on longitudinal SHI  
50  
51 263 claims data, cross-sectional data collected in nursing homes as well as transcripts of expert  
52  
53 264 interviews and case conferences, differences in the utilization of medical care are identified,  
54  
55 265 met and unmet medical care needs are quantified, explanations of inappropriate provision of  
56  
57  
58  
59

1  
2  
3 266 medical care are provided and pilot projects are developed aiming to improve the provision of  
4  
5 267 medical care where it is found to be inappropriate. Participatory approaches involve GPs,  
6  
7 268 medical specialists, nursing home staff, SHI employees, nursing home residents and relatives.  
8  
9 269 This is expected to result in strong acceptance and effective pilot projects which will be  
10  
11 270 systematically evaluated in a follow-up study.

12  
13 271 There are, however, some limitations to consider. First, in the present study, all nursing homes  
14  
15 272 in the federal state of Bremen are invited to participate and to recruit nursing home residents  
16  
17 273 for study participation. Differences in the willingness to participate among nursing homes and  
18  
19 274 nursing home residents may result in a selective study population. The claims-based non-  
20  
21 275 response analysis, however, permits the identification of structural differences between  
22  
23 276 participants and non-participants. Second, the study focuses on nursing homes located in the  
24  
25 277 federal state of Bremen and members of one local SHI fund. Therefore, the generalizability of  
26  
27 278 research findings may be limited.

28  
29  
30 279 In conclusion, the findings from this study enhance our knowledge of met and unmet medical  
31  
32 280 care needs in nursing homes. The pilot projects provide a first step towards a sustainable  
33  
34 281 improvement of medical care in German nursing homes. Therefore, it is expected that the  
35  
36 282 findings are highly relevant for many stakeholders from the fields of nursing and medical  
37  
38 283 care.

39  
40  
41 284

## 42 43 285 **Ethics and dissemination**

44  
45  
46 286 The Ethics Committee of the University of Bremen approved this study on November 23,  
47  
48 287 2017. All eligible nursing home residents and all nursing home staff are informed in detail  
49  
50 288 about the study. Informed consent is obtained from all included nursing home residents (or  
51  
52 289 their legal guardians where applicable). Informed consent is also obtained from all persons  
53  
54 290 included in the expert interviews, case conferences and Delphi study. Dissemination strategies



1  
2  
3 291 include presentations at national and international conferences and publications in peer-  
4  
5 292 reviewed scientific journals.  
6

7 293

8  
9 294 **Acknowledgements**

10  
11 295 We are grateful to the AOK Bremen/Bremerhaven for the provision of longitudinal SHI  
12  
13 296 claims data and to Vicki May for proofreading this protocol.  
14  
15

16 297

17  
18 298 **Footnotes**

19  
20 299 **Contributors:** JC, TK, ASchw, GS, KW-O, AG and HR designed the study. MS, TK, CT,  
21  
22 300 ASchw and HR specified the analysis of longitudinal SHI claims data. MS, FH, DK, ASchw,  
23  
24 301 SK, GS, KW-O, AG and HR specified the collection of cross-sectional primary data. JC, MS,  
25  
26 302 FH, DG, ASchw, CT, ASchw and SK wrote the first draft of the protocol which was critically  
27  
28 303 revised by TK, GS, KW-O, AG and HR. All authors approved the final version of the  
29  
30 304 protocol.  
31  
32

33 305 **Funding:** This work was supported by the Innovation Committee at the Federal Joint  
34  
35 306 Committee (grant number 01VSF16039).  
36

37 307 **Competing interests:** None declared.  
38  
39

40 308

41  
42 309 **Figures**

43  
44 310 See separate file (Figure\_1.TIF)  
45

46 311 **Figure 1 Conceptual framework of the mixed-methods study**

47  
48 312

49  
50 313

51  
52 314

53  
54 315  
55  
56  
57  
58  
59  
60

316 **References**

- 317 1. Iliffe S, Davies SL, Gordon AL, et al. Provision of NHS generalist and specialist services  
318 to care homes in England: review of surveys. *Prim Health Care Res Dev* 2016;17(2):122-  
319 37.
- 320 2. Balzer K, Butz S, Bentzel J, et al. Medical specialist attendance in nursing homes. *GMS*  
321 *Health Technol Assess* 2013;9:Doc02.
- 322 3. Burns E, Nair S. New horizons in care home medicine. *Age Ageing* 2014;43(1):2-7.
- 323 4. Briggs R, Holmerová I, Martin FC, et al. Towards standards of medical care for  
324 physicians in nursing homes. *Eur Geriatr Med* 2015;6(4):401-3.
- 325 5. Gordon AL, Franklin M, Bradshaw L, et al. Health status of UK care home residents: a  
326 cohort study. *Age Ageing* 2014; 43(1):97-103.
- 327 6. Bjork S, Juthberg C, Lindkvist M, et al. Exploring the prevalence and variance of  
328 cognitive impairment, pain, neuropsychiatric symptoms and ADL dependency among  
329 persons living in nursing homes; a cross-sectional study. *BMC geriatr* 2016; 16:154.
- 330 7. Tolson D, Rolland Y, Andrieu S, et al. International Association of Gerontology and  
331 Geriatrics: a global agenda for clinical research and quality of care in nursing homes. *J*  
332 *Am Med Dir Assoc* 2011;12(3):184-9.
- 333 8. Thibault L, Kergoat H. Eye care services for older institutionalised individuals affected by  
334 cognitive and visual deficits: a systematic review. *Ophthalmic Physiol Opt*  
335 2016;36(5):566-83.
- 336 9. Yamada Y, Vlachova M, Richter T, et al.. Prevalence and correlates of hearing and visual  
337 impairments in European nursing homes: results from the SHELTER study. *J Am Med Dir*  
338 *Assoc* 2014;15(10):738-43.
- 339 10. Cohen-Mansfield J, Infeld DL. Hearing aids for nursing home residents: current policy  
340 and future needs. *Health Policy* 2006;79(1):49-56.

- 1  
2  
3 341 11. Zenthofer A, Rammelsberg P, Cabrera T, et al.. Increasing dependency of older people in  
4  
5 342 nursing homes is associated with need for dental treatments. *Neuropsychiatr Dis Treat*  
6  
7 343 2014;10:2285-90.  
8  
9 344 12. Muller F, Naharro M, Carlsson GE. What are the prevalence and incidence of tooth loss in  
10  
11 345 the adult and elderly population in Europe? *Clin Oral Impl Res* 2007;18 Suppl 3:2-14.  
12  
13 346 13. Lukas A, Mayer B, Onder G, et al. [Pain therapy in German long-term care facilities in a  
14  
15 347 European comparison. Results of the SHELTER study]. *Schmerz* 2015;29(4):411-21.  
16  
17 348 14. Storms H, Marquet K, Aertgeerts B, et al. Prevalence of inappropriate medication use in  
18  
19 349 residential long-term care facilities for the elderly: a systematic review. *Eur J Gen Pract*  
20  
21 350 2017;23(1):69-77.  
22  
23 351 15. Dörks M, Allers K, Schmiemann G, et al. Inappropriate medication in non-hospitalized  
24  
25 352 patients with renal insufficiency: a systematic review. *J Am Geriatr Soc* 2017;65(4):853-  
26  
27 353 62.  
28  
29 354 16. Morin L, Laroche ML, Texier G, et al. Prevalence of potentially inappropriate medication  
30  
31 355 use in older adults living in nursing homes: a systematic review. *J Am Med Dir Assoc*  
32  
33 356 2016;17(9):862.e1-9.  
34  
35 357 17. Johnell K. Inappropriate drug use in people with cognitive impairment and dementia: a  
36  
37 358 systematic review. *Curr Clin Pharmacol* 2015;10(3):178-84.  
38  
39 359 18. Atramont A, Bourdel-Marchasson I, Bonnet-Zamponi D, et al. Impact of nursing home  
40  
41 360 admission on health care use and disease status elderly dependent people one year before  
42  
43 361 and one year after skilled nursing home admission based on 2012-2013 SNIIRAM data.  
44  
45 362 *BMC Health Serv Res* 2017;17(1):667.  
46  
47 363 19. Atramont A, Bonnet-Zamponi D, Bourdel-Marchasson I, et al. Health status and drug use  
48  
49 364 1 year before and 1 year after skilled nursing home admission during the first quarter of  
50  
51 365 2013 in France: a study based on the French National Health Insurance Information  
52  
53 366 System. *Eur J Clin Pharmacol.* 2018;74(1):109-18.  
54  
55  
56  
57  
58  
59  
60

- 1  
2  
3 367 20. Kohlbacher F. The use of qualitative content analysis in case study research. *Forum: Qual*  
4  
5 368 *Soc Res* 2006; doi:10.17169/fqs-7.1.75.  
6  
7 369 21. Witzel A. The problem-centered interview. *Forum: Qual Soc Res* 2000; doi:10.17169/fqs-  
8  
9 370 1.1.1132.  
10  
11 371 22. Kleina T, Horn A, Suhr R, et al. [Current status of medical care for nursing home  
12  
13 372 residents in Germany - results of an empirical study]. *Gesundheitswesen* 2017;79(5):382-  
14  
15 373 87.  
16  
17 374 23. Schmiemann G, Herget-Rosenthal S, Hoffmann F. [Medical services for nursing home  
18  
19 375 residents : results of the study on inappropriate medication in patients with renal  
20  
21 376 insufficiency in nursing homes]. *Z Gerontol Geriatr* 2016;49(8):727-33.  
22  
23 377 24. Pittrow D, Krappweis J, Rentsch A, et al. Pattern of prescriptions issued by nursing home-  
24  
25 378 based physicians versus office-based physicians for frail elderly patients in German  
26  
27 379 nursing homes. *Pharmacoepidemiol Drug Saf* 2003;12(7):595-9.  
28  
29 380 25. Bailey IL, Lovie JE. New design principles for visual acuity letter charts. *Am J Optom*  
30  
31 381 *Physiol Opt* 1976;53(11):740-5.  
32  
33 382 26. Macphee GJ, Crowther JA, McAlpine CH. A simple screening test for hearing impairment  
34  
35 383 in elderly patients. *Age Ageing* 1988;17(5):347-51.  
36  
37 384 27. Chalmers JM, King PL, Spencer AJ, et al. The Oral Health Assessment Tool--validity and  
38  
39 385 reliability. *Aust Dent J* 2005;50(3):191-9.  
40  
41 386 28. John MT, Miglioretti DL, LeResche L, et al. German short forms of the Oral Health  
42  
43 387 Impact Profile. *Community Dent Oral Epidemiol* 2006;34(4):277-88.  
44  
45 388 29. Morfeld M, Kirchberger I, Bullinger M. SF-36. Fragebogen zum Gesundheitszustand:  
46  
47 389 Deutsche Version des Short Form - 36 Health Survey. Göttingen: Hogrefe; 2011.  
48  
49 390 30. Yesavage JA, Brink TL, Rose TL, et al.. Development and validation of a geriatric  
50  
51 391 depression screening scale: a preliminary report. *J Psychiatr Res* 1982;17(1):37-49.  
52  
53  
54  
55  
56  
57  
58  
59  
60

- 1  
2  
3 392 31. Allgaier AK, Kramer D, Mergl R, et al. [Validity of the geriatric depression scale in  
4  
5 393 nursing home residents: comparison of GDS-15, GDS-8, and GDS-4]. *Psychiatrische*  
6  
7 394 *Praxis* 2011;38(6):280-6.
- 8  
9 395 32. Alexopoulos GS, Abrams RC, Young RC, et al. Cornell Scale for Depression in  
10  
11 396 Dementia. *Biol Psychiatry* 1988;23(3):271-84.
- 12  
13 397 33. Folstein MF, Folstein SE, McHugh PR. "Mini-mental state". A practical method for  
14  
15 398 grading the cognitive state of patients for the clinician. *J Psychiatr Res* 1975;12(3):189-  
16  
17 399 98.
- 18  
19 400 34. Prosiegel M, Böttger S, Schenk T, et al. Der Erweiterte Barthel-Index (EBI) - eine neue  
20  
21 401 Skala zur Erfassung von Fähigkeitsstörungen bei neurologischen Patienten. *Neurol*  
22  
23 402 *Rehabil* 1996;2:7-13.
- 24  
25 403 35. Rubenstein LZ, Harker JO, Salva A, et al. Screening for undernutrition in geriatric  
26  
27 404 practice: developing the short-form mini-nutritional assessment (MNA-SF). *J Gerontol A*  
28  
29 405 *Biol Sci Med Sci* 2001;56(6):M366-72.
- 30  
31 406 36. Vellas B, Villars H, Abellan G, et al. Overview of the MNA--Its history and challenges. *J*  
32  
33 407 *Nutr Health Aging* 2006;10(6):456-63; discussion 463-5.
- 34  
35 408 37. Guigoz Y. The Mini Nutritional Assessment (MNA) review of the literature--What does it  
36  
37 409 tell us? *J Nutr Health Aging* 2006;10(6):466-85; discussion 485-7.
- 38  
39 410 38. Kaiser MJ, Bauer JM, Ramsch C, et al. Validation of the Mini Nutritional Assessment  
40  
41 411 short-form (MNA-SF): a practical tool for identification of nutritional status. *J Nutr*  
42  
43 412 *Health Aging* 2009;13(9):782-8.
- 44  
45  
46  
47  
48  
49  
50  
51  
52  
53  
54  
55  
56  
57  
58  
59  
60

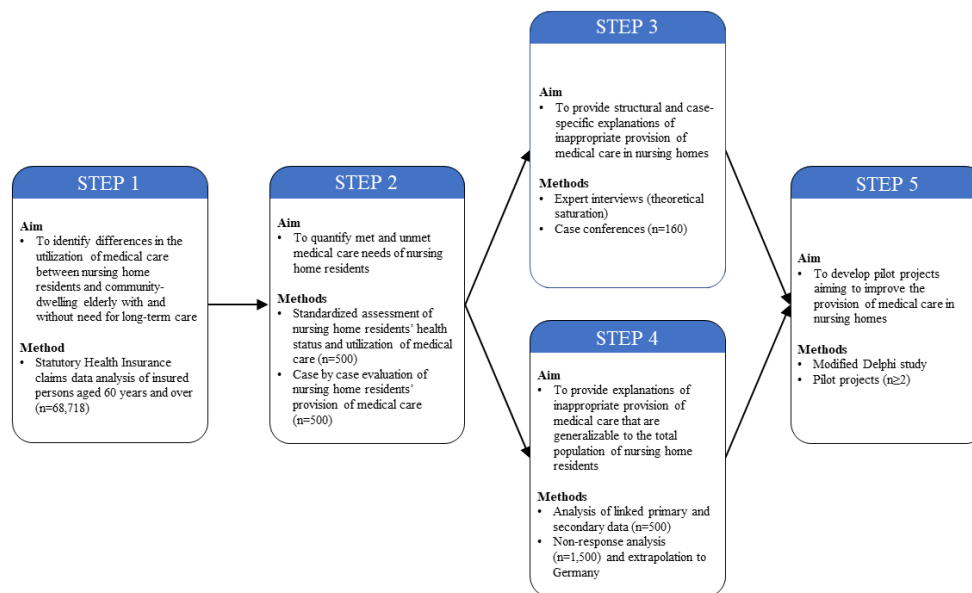

Figure 1 Conceptual framework of the mixed-methods study

307x188mm (96 x 96 DPI)

# BMJ Open

## Needs-based provision of medical care to nursing home residents: protocol for a mixed-methods study

|                                 |                                                                                                                                                                                                                                                                                                                                                                                                                                                                                                                                                                                                                                                                                                                                                                                                                                                                                                                                                                                                                                                                                                                                                                                                                                                                                                                                                                                                                                                                                                                                                                                                                                                                                                                                                                                                                                                                                                                                                                                                                                                                                                                                                                                                                                                                                                                                                                                                                                                    |
|---------------------------------|----------------------------------------------------------------------------------------------------------------------------------------------------------------------------------------------------------------------------------------------------------------------------------------------------------------------------------------------------------------------------------------------------------------------------------------------------------------------------------------------------------------------------------------------------------------------------------------------------------------------------------------------------------------------------------------------------------------------------------------------------------------------------------------------------------------------------------------------------------------------------------------------------------------------------------------------------------------------------------------------------------------------------------------------------------------------------------------------------------------------------------------------------------------------------------------------------------------------------------------------------------------------------------------------------------------------------------------------------------------------------------------------------------------------------------------------------------------------------------------------------------------------------------------------------------------------------------------------------------------------------------------------------------------------------------------------------------------------------------------------------------------------------------------------------------------------------------------------------------------------------------------------------------------------------------------------------------------------------------------------------------------------------------------------------------------------------------------------------------------------------------------------------------------------------------------------------------------------------------------------------------------------------------------------------------------------------------------------------------------------------------------------------------------------------------------------------|
| Journal:                        | <i>BMJ Open</i>                                                                                                                                                                                                                                                                                                                                                                                                                                                                                                                                                                                                                                                                                                                                                                                                                                                                                                                                                                                                                                                                                                                                                                                                                                                                                                                                                                                                                                                                                                                                                                                                                                                                                                                                                                                                                                                                                                                                                                                                                                                                                                                                                                                                                                                                                                                                                                                                                                    |
| Manuscript ID                   | bmjopen-2018-025614.R1                                                                                                                                                                                                                                                                                                                                                                                                                                                                                                                                                                                                                                                                                                                                                                                                                                                                                                                                                                                                                                                                                                                                                                                                                                                                                                                                                                                                                                                                                                                                                                                                                                                                                                                                                                                                                                                                                                                                                                                                                                                                                                                                                                                                                                                                                                                                                                                                                             |
| Article Type:                   | Protocol                                                                                                                                                                                                                                                                                                                                                                                                                                                                                                                                                                                                                                                                                                                                                                                                                                                                                                                                                                                                                                                                                                                                                                                                                                                                                                                                                                                                                                                                                                                                                                                                                                                                                                                                                                                                                                                                                                                                                                                                                                                                                                                                                                                                                                                                                                                                                                                                                                           |
| Date Submitted by the Author:   | 21-Dec-2018                                                                                                                                                                                                                                                                                                                                                                                                                                                                                                                                                                                                                                                                                                                                                                                                                                                                                                                                                                                                                                                                                                                                                                                                                                                                                                                                                                                                                                                                                                                                                                                                                                                                                                                                                                                                                                                                                                                                                                                                                                                                                                                                                                                                                                                                                                                                                                                                                                        |
| Complete List of Authors:       | <p>Czwikla, Jonas; University of Bremen, SOCIUM Research Center on Inequality and Social Policy, Department of Health, Long-term Care and Pensions; University of Bremen, High-Profile Area Health Sciences</p> <p>Schulz, M; University of Bremen, SOCIUM Research Center on Inequality and Social Policy, Department of Health, Long-term Care and Pensions; University of Bremen, High-Profile Area Health Sciences</p> <p>Heinze, Franziska; University of Bremen, SOCIUM Research Center on Inequality and Social Policy, Department of Health, Long-term Care and Pensions; University of Bremen, High-Profile Area Health Sciences</p> <p>Kalwitzki, Thomas; University of Bremen, SOCIUM Research Center on Inequality and Social Policy, Department of Health, Long-term Care and Pensions; University of Bremen, High-Profile Area Health Sciences</p> <p>Gand, Daniel; University of Bremen, Institute of Public Health and Nursing Research (IPP), Department for Health Services Research; University of Bremen, High-Profile Area Health Sciences</p> <p>Schmidt, Annika; University of Bremen, Institute of Public Health and Nursing Research (IPP), Department for Health Care Research; University of Bremen, High-Profile Area Health Sciences</p> <p>Tsiasioti, Chrysanthi; Research Institute of the Local Health Care Funds (WIdO)</p> <p>Schwinger, Antje; Research Institute of the Local Health Care Funds (WIdO)</p> <p>Kloep, Stephan; University of Bremen, Competence Center for Clinical Trials (KKSb); University of Bremen, High-Profile Area Health Sciences</p> <p>Schmiemann, Guido; University of Bremen, Institute of Public Health and Nursing Research (IPP), Department for Health Services Research; Hannover Medical School, Institute for General Practice</p> <p>Wolf-Ostermann, Karin; University of Bremen, Institute of Public Health and Nursing Research (IPP), Department for Health Care Research; University of Bremen, High-Profile Area Health Sciences</p> <p>Gerhardus, Ansgar; University of Bremen, Institute of Public Health and Nursing Research (IPP), Department for Health Services Research; University of Bremen, High-Profile Area Health Sciences</p> <p>Rothgang, Heinz; University of Bremen, SOCIUM Research Center on Inequality and Social Policy, Department of Health, Long-term Care and Pensions; University of Bremen, High-Profile Area Health Sciences, Bremen</p> |
| <b>Primary Subject Heading</b>: | Health services research                                                                                                                                                                                                                                                                                                                                                                                                                                                                                                                                                                                                                                                                                                                                                                                                                                                                                                                                                                                                                                                                                                                                                                                                                                                                                                                                                                                                                                                                                                                                                                                                                                                                                                                                                                                                                                                                                                                                                                                                                                                                                                                                                                                                                                                                                                                                                                                                                           |

1  
2  
3  
4  
5  
6  
7  
8  
9  
10  
11  
12  
13  
14  
15  
16  
17  
18  
19  
20  
21  
22  
23  
24  
25  
26  
27  
28  
29  
30  
31  
32  
33  
34  
35  
36  
37  
38  
39  
40  
41  
42  
43  
44  
45  
46  
47  
48  
49  
50  
51  
52  
53  
54  
55  
56  
57  
58  
59  
60

|                            |                                                                                                                |
|----------------------------|----------------------------------------------------------------------------------------------------------------|
| Secondary Subject Heading: | Geriatric medicine, Ophthalmology, Ear, nose and throat/otolaryngology, Dentistry and oral medicine, Neurology |
| Keywords:                  | Medical care, Nursing homes, Needs assessment, Administrative claims, Health services research                 |
|                            |                                                                                                                |

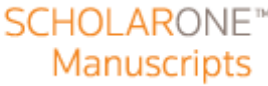



1  
2  
3 **1 Needs-based provision of medical care to nursing home residents: protocol for a**  
4  
5 **2 mixed-methods study**

6  
7  
8 3 Jonas Czwikla<sup>1,7</sup>, Maike Schulz<sup>1,7</sup>, Franziska Heinze<sup>1,7</sup>, Thomas Kalwitzki<sup>1,7</sup>, Daniel Gand<sup>2,7</sup>,  
9  
10 4 Annika Schmidt<sup>3,7</sup>, Chrysanthi Tsiasioti<sup>4</sup>, Antje Schwinger<sup>4</sup>, Stephan Kloep<sup>5,7</sup>, Guido  
11  
12 5 Schmiemann<sup>2,6,7</sup>, Karin Wolf-Ostermann<sup>3,7</sup>, Ansgar Gerhardus<sup>2,7</sup>, Heinz Rothgang<sup>1,7</sup>

13  
14  
15 6 <sup>1</sup> University of Bremen, SOCIUM Research Center on Inequality and Social Policy,  
16  
17 7 Department of Health, Long-term Care and Pensions, Mary-Somerville-Straße 5, 28359  
18  
19 8 Bremen, Germany

20  
21  
22 9 <sup>2</sup> University of Bremen, Institute of Public Health and Nursing Research (IPP), Department  
23  
24 10 for Health Services Research, Grazer Straße 4, 28359 Bremen, Germany

25  
26  
27 11 <sup>3</sup> University of Bremen, Institute of Public Health and Nursing Research (IPP), Department  
28  
29 12 for Health Care Research, Grazer Straße 4, 28359 Bremen, Germany

30  
31  
32 13 <sup>4</sup> Research Institute of the Local Health Care Funds (WIdO), Rosenthaler Str. 31, 10178  
33  
34 14 Berlin, Germany

35  
36  
37 15 <sup>5</sup> University of Bremen, Competence Center for Clinical Trials (KKSB), Linzer Straße 4,  
38  
39 16 28359 Bremen, Germany

40  
41  
42 17 <sup>6</sup> Hannover Medical School, Institute for General Practice, Carl-Neuberg-Straße 1, 30625  
43  
44 18 Hannover, Germany

45  
46  
47 19 <sup>7</sup> University of Bremen, High-Profile Area Health Sciences, Bremen, Germany

48  
49  
50 **21 Corresponding author:**

51  
52 22 Jonas Czwikla, M.A. (czwikla@uni-bremen.de)

53  
54 23 University of Bremen, SOCIUM Research Center on Inequality and Social Policy

55  
56 24 Mary-Somerville-Straße 5, 28359 Bremen, Germany

57  
58  
59 25 Phone: +49 (0)421 218 58633  
60

1  
2  
3 **26 Co-authors:**  
4

5 27 Dr. Maïke Schulz (maïke.schulz@uni-bremen.de)  
6

7 28 Franziska Heinze, M.Sc. (fheinze@uni-bremen.de)  
8

9 29 Dipl.-Geront. Thomas Kalwitzki (thomas.kalwitzki@uni-bremen.de)  
10

11 30 Daniel Gand, M.A. (daniel.gand@uni-bremen.de)  
12

13 31 Annika Schmidt, M.Sc. (schmidt.annika@uni-bremen.de)  
14

15 32 Chrysanthi Tsiasioti (Chrysanthi.Tsiasioti@wido.bv.aok.de)  
16

17 33 Dr. Antje Schwinger (antje.schwinger@wido.bv.aok.de)  
18

19 34 Dr. Stephan Kloep (kloep@math.uni-bremen.de)  
20

21 35 PD Dr. Guido Schmiemann (schmiema@uni-bremen.de)  
22

23 36 Prof. Dr. Karin Wolf-Ostermann (wolf-ostermann@uni-bremen.de)  
24

25 37 Prof. Dr. Ansgar Gerhardus (ansgar.gerhardus@uni-bremen.de)  
26

27 38 Prof. Dr. Heinz Rothgang (rothgang@uni-bremen.de)  
28

29 39  
30

31 40 **Word count: 2.539**  
32

33 41  
34

35 42  
36

37 43  
38

39 44  
40

41 45  
42

43 46  
44

45 47  
46

47 48  
48

49 49  
50

51 50  
52

53 51  
54  
55  
56  
57  
58  
59  
60

1  
2  
3 **52 Abstract**  
4

5 **53 Introduction** Nursing home residents typically have greater needs for medical care than  
6  
7  
8 **54** community-dwelling elderly. However, restricted cognitive abilities and limited mobility may  
9  
10 **55** impede their access to general practitioners and medical specialists. The provision of medical  
11  
12 **56** care in nursing homes may therefore be inappropriate in some areas of medical care. The  
13  
14 **57** purpose of this mixed-methods study is to systematically assess, evaluate and explain met and  
15  
16 **58** unmet medical care needs in German nursing homes and to develop solutions where medical  
17  
18 **59** care is found to be inappropriate.

21 **60 Methods and analysis** First, Statutory Health Insurance claims data are analyzed to identify  
22  
23 **61** differences in the utilization of medical care between nursing home residents and community-  
24  
25 **62** dwelling elderly with and without need for long-term care. Second, the health status and  
26  
27 **63** medical care of 500 nursing home residents are assessed and evaluated to quantify met and  
28  
29 **64** unmet medical care needs. Third, qualitative expert interviews and case conferences and,  
30  
31 **65** fourth, quantitative analyses of linked data are used to provide structural, case-specific and  
32  
33 **66** generalizable explanations of inappropriate medical care among nursing home residents.  
34  
35 **67** Fifth, a modified Delphi study is employed to develop pilot projects aiming to improve  
36  
37 **68** medical care in nursing homes.

42 **69 Ethics and dissemination** This study was approved by the Ethics Committee of the  
43  
44 **70** University of Bremen. Research findings are disseminated through presentations at national  
45  
46 **71** and international conferences and publications in peer-reviewed scientific journals.

49 **72 Trial registration number** DRKS00012383  
50  
51  
52  
53  
54  
55  
56  
57  
58  
59  
60  
61  
62  
63  
64  
65  
66  
67  
68  
69  
70  
71  
72  
73  
74  
75  
76  
77

1  
2  
3 78 **Article Summary**  
4

5 79 **Strengths and limitations of this study**  
6  
7

- 8 80 • Based on longitudinal Statutory Health Insurance claims data, cross-sectional data  
9  
10 81 collected in nursing homes, expert interviews and case conferences the provision of  
11  
12 82 medical care is analyzed for the first time in relation to individual medical care needs  
13  
14 83 among nursing home residents in Germany.  
15  
16  
17 84 • The mixed-methods designs allows a comprehensive assessment, evaluation and  
18  
19 85 explanation of met and unmet medical care needs in nursing homes.  
20  
21  
22 86 • Participatory approaches involving general practitioners, medical specialists, nursing  
23  
24 87 home staff, Statutory Health Insurance employees, nursing home residents and  
25  
26 88 relatives are used to increase the acceptance and effectiveness of pilot projects to be  
27  
28 89 developed to improve medical care where it is found to be inappropriate.  
29  
30  
31 90 • Differences in the willingness to participate among nursing homes and nursing home  
32  
33 91 residents may result in a selective study population.  
34  
35  
36 92 • Focusing on nursing homes located in the federal state of Bremen and members of one  
37  
38 93 local Statutory Health Insurance fund may limit the generalizability of the study  
39  
40 94 results.  
41  
42  
43 95  
44  
45 96  
46  
47 97  
48  
49 98  
50  
51  
52 99  
53  
54 100  
55  
56 101  
57  
58 102  
59  
60

## 103 **Introduction**

104 Nursing home residents may not receive appropriate medical care since restricted cognitive  
105 abilities and limited mobility may impede their access to general practitioners (GPs) and  
106 medical specialists.[1-3] Moreover, nursing home residents typically suffer from  
107 multimorbidity, frailty, cognitive impairments and polypharmacy, resulting in diverse medical  
108 care needs that compound the challenge of providing appropriate medical care.[4-7]  
109 Empirical studies support this view, indicating inappropriate medical care provision in  
110 nursing homes for the treatment of visual and hearing impairments,[8-10] oral health  
111 care,[1,2,11,12] pain treatment[13] and drug prescriptions.[2,14-17] Atramont et al.,  
112 furthermore, found nursing home admission to be negatively associated with some forms of  
113 outpatient care[18] and positively associated with psychotropic and antibacterial drug use.[19]  
114 There is, however, hardly any empirical evidence on explanations of inappropriate medical  
115 care provision in nursing homes. In this regard, a health technology assessment report  
116 concluded that there is not sufficient data available to allow recommendations to be drawn on  
117 how medical care provision in German nursing homes can be improved.[2]  
118 Given this lack of evidence, the proposed research project aims to systematically assess,  
119 evaluate and explain met and unmet medical care needs in German nursing homes and to  
120 develop solutions where medical care is found to be inappropriate. The specific aims are: (1)  
121 to identify differences in the utilization of medical care between a) nursing home residents, b)  
122 community-dwelling elderly in need for long-term care and c) community-dwelling elderly  
123 without need for long-term care; (2) to quantify met and unmet medical care needs of nursing  
124 home residents; (3) to provide structural and case-specific explanations of inappropriate  
125 medical care provision in nursing homes; (4) to provide explanations of inappropriate medical  
126 care provision that are generalizable to the total population of nursing home residents; and (5)  
127 to develop pilot projects aiming to improve medical care provision in nursing homes.

## 128 **Methods and analysis**

129 This mixed-methods study is running from April 1, 2017 to March 31, 2020. It is structured  
130 into five steps (figure 1). In step 1, Statutory Health Insurance (SHI) claims data are analyzed  
131 in order to identify differences in the utilization of medical care between nursing home  
132 residents and community-dwelling elderly with and without the need for long-term care. Such  
133 differences in the utilization of medical care may indicate, but not prove, inappropriate  
134 medical care provision in nursing homes. Thus, in step 2, nursing home residents' health  
135 status and utilization of medical care are assessed and evaluated to quantify met and unmet  
136 medical care needs with respect to vision, hearing, oral health and Parkinson's disease. In  
137 steps 3 and 4, qualitative expert interviews and case conferences as well as quantitative  
138 methods are used to provide structural, case-specific and generalizable explanations of  
139 inappropriate medical care in nursing homes. In step 5, a modified Delphi study is used to  
140 generate ideas on how to improve the provision of medical care in nursing homes.  
141 Consequently, at least two pilot projects are developed and implemented in one nursing home  
142 to test for practicability. In the following sections, each step is described in detail.

143

### 144 **Step 1: Analysis of SHI claims data**

145 SHI claims data from AOK Bremen/Bremerhaven, a local SHI fund, are analyzed to identify  
146 differences in the utilization of medical care that indicate inappropriate medical care provision  
147 in German nursing homes. The available data comprise information on sex, age, in- and  
148 outpatient care as well as on long-term care use. All diagnoses are coded according to the  
149 German Modification of the International Classification of Diseases, 10th Revision (ICD-10-  
150 GM) and can be differentiated according to GPs and medical specialties in the outpatient  
151 setting.

152 From 245,000 insured persons, a subsample of 68,718 insured persons aged 60 years and over  
153 is drawn. Insured persons with missing or invalid information on demographic characteristics

154 (n = 124) are not considered. For this subsample, the morbidity status of each insured person  
 155 is defined by 31 disease categories related to at least one of 13 examined medical specialties  
 156 (table 1).

157

158 **Table 1 Disease categories and related medical specialties used to define the individual**  
 159 **morbidity status of insured persons examined in step 1**

| No. | Disease categories                                                                                  | ICD-10-GM 2015 codes        | Related medical specialties*            |
|-----|-----------------------------------------------------------------------------------------------------|-----------------------------|-----------------------------------------|
| 01  | Hypertensive diseases                                                                               | I10-I15                     | Internal medicine, cardiology           |
| 02  | Ischemic heart diseases                                                                             | I20-I52                     | Internal medicine, cardiology           |
| 03  | Metabolic disorders                                                                                 | E70-E90                     | Internal medicine                       |
| 04  | Arthropathies                                                                                       | M00-M25                     | Internal medicine, orthopedics          |
| 05  | Diabetes mellitus                                                                                   | E10-E14                     | Internal medicine                       |
| 06  | Dorsopathies                                                                                        | M40-M54                     | Orthopedics                             |
| 07  | Disorders of thyroid gland                                                                          | E00-E07                     | Internal medicine                       |
| 08  | Vascular diseases                                                                                   | I70-I89                     | Internal medicine, cardiology           |
| 09  | Organic, including symptomatic, mental disorders; other degenerative diseases of the nervous system | F00-F09; G30-G32            | Neurology/psychiatry                    |
| 10  | Diseases of esophagus, stomach and duodenum; hernia; other diseases of intestines                   | K20-K31; K40-K46; K55-K64   | Internal medicine                       |
| 11  | Chronic lower respiratory diseases                                                                  | J40-J47                     | Internal medicine, pulmonology          |
| 12  | Mood (affective) disorders                                                                          | F30-F39                     | Neurology/psychiatry                    |
| 13  | Cerebrovascular diseases                                                                            | I60-I69                     | Internal medicine, neurology/psychiatry |
| 14  | Neurotic, stress-related and somatoform disorders                                                   | F40-F48                     | Neurology/psychiatry                    |
| 15  | Symptoms and signs involving the urinary system; other diseases of urinary system                   | R30-R39; N30-N39            | Gynecology, urology                     |
| 16  | Diseases of the eye and adnexa                                                                      | H00-H59                     | Ophthalmology                           |
| 17  | Renal failure                                                                                       | N17-N19                     | Internal medicine, nephrology           |
| 18  | Osteopathies and chondropathies                                                                     | M80-M94                     | Orthopedics                             |
| 19  | Diseases of the ear and mastoid process                                                             | H60-H95                     | Otorhinolaryngology                     |
| 20  | Mononeuropathies; polyneuropathies and other disorders of the peripheral nervous system             | G56; G57; G58; G59; G60-G64 | Internal medicine, neurology/psychiatry |
| 21  | Diseases of male genital organs                                                                     | N40-N51                     | Urology                                 |
| 22  | Dermatitis, eczema; melanoma and other malignant neoplasms of skin                                  | L20-L30; C43-C44            | Dermatology, surgery                    |
| 23  | Noninflammatory disorders of female genital tract                                                   | N80-N98                     | Gynecology                              |
| 24  | Other disorders of the skin and subcutaneous tissue                                                 | L80-L99                     | Dermatology                             |
| 25  | Extrapyramidal and movement disorders                                                               | G20-G26                     | Internal medicine, neurology/psychiatry |
| 26  | Mental and behavioral disorders due to psychoactive substance use                                   | F10-F19                     | Neurology/psychiatry                    |
| 27  | Cerebral palsy and other paralytic syndromes                                                        | G80-G83                     | Internal medicine, neurology/psychiatry |
| 28  | Obesity and other hyperalimentation; Malnutrition                                                   | E65-E68; E40-E46            | Internal medicine                       |
| 29  | Schizophrenia, schizotypal and delusional disorders; disorders of adult personality and behavior    | F20-F29; F60-F69            | Neurology/psychiatry                    |
| 30  | Functional impairments                                                                              | U50-U52                     | Internal medicine, Orthopedics          |

31 Injuries

S00-S09; S10-S19; S20-S29;  
S30-S39; S40-S49; S50-S59;  
S60-S69; S70-S79; S80-S89;  
S90-S99; T08-T14

Orthopedics, surgery

---

160 \*Due to the availability of data, dentistry had to be analyzed separately and is therefore not presented.

161

162 Zero-inflated Poisson regression analyses are conducted to investigate the probability  
163 (component I) and intensity (component II) of medical care for the resulting 45 combinations  
164 of disease categories and related medical specialties separately. Each regression model  
165 includes only those insured persons who are diagnosed in the examined disease category and  
166 have valid information on all variables included in the model. The dependent variable is the  
167 number of outpatient visits in the related medical specialty in 2015. Independent variables are  
168 the remaining 30 disease categories, age, sex, region, death, care setting and dummy variables  
169 as a combination of the obtained level of care and the care setting. In a sensitivity analysis, the  
170 probability and intensity of medical care is investigated using logistic and linear regression  
171 analyses, respectively.

## 173 **Step 2: Assessment of nursing home residents**

174 The standardized assessment focuses on vision, hearing, oral health and Parkinson's disease.  
175 It consists of two parts: First, the individual health status and medical care provision of 500  
176 nursing home residents are assessed. Second, the provision of medical care is evaluated for  
177 each resident to determine met and unmet medical care needs.

178 Residents are eligible for assessment if a) they are in need for long-term care, b) are aged 60  
179 years and over, c) have been residing in a nursing home located in the federal state of Bremen  
180 for at least 12 months and d) are a member of the AOK Bremen/Bremerhaven. The total  
181 number of eligible nursing home residents is approximately 1,800. Assuming a realistic  
182 response rate of 25-30% results in approximately 500 study participants. The recruitment  
183 strategy comprises two stages: At stage one, the total number of nursing homes located in the



1  
2  
3 184 federal state of Bremen is approached for participation. At stage two, eligible residents (or  
4  
5 185 their legal guardians) are recruited by the nursing homes agreeing to participate and  
6  
7 186 approached for informed consent. In case of reaching considerably less than 500 participants,  
8  
9 187 the recruitment strategy may be extended to the federal state of Lower Saxony to ensure that  
10  
11 188 enough nursing home residents with met and unmet medical care needs are included in the  
12  
13 189 explanation of inappropriate medical care provision (steps 3 and 4).  
14

15  
16  
17 190 The standardized assessment is carried out by trained study nurses and includes: (1)  
18  
19 191 examinations of residents, (2) self-assessments by residents, (3) proxy-assessments by  
20  
21 192 residents' care nurses and (4) reviews of medical charts (table 2).  
22  
23

24 193

25  
26 194

27  
28 195

29  
30 196

31  
32 197

33  
34 198

35  
36 199

37  
38 200

39  
40 201

41  
42 202

43  
44 203

45  
46 204

47  
48 205

49  
50 206

51  
52 207

53  
54 208

55  
56 209  
57  
58  
59  
60

1  
2  
3 210  
4  
5  
6  
7  
8  
9  
10  
11  
12  
13  
14  
15  
16  
17  
18  
19  
20  
21  
22  
23  
24  
25  
26  
27  
28  
29  
30  
31 211  
32 212  
33  
34 213  
35  
36 214  
37  
38 215  
39  
40  
41  
42  
43  
44  
45  
46

**Table 2 Instruments used to assess cross-sectional data in step 2**

| Category                        | Instrument                                                                                                                                                                                                      | Source* |   |   |   |
|---------------------------------|-----------------------------------------------------------------------------------------------------------------------------------------------------------------------------------------------------------------|---------|---|---|---|
|                                 |                                                                                                                                                                                                                 | E       | S | P | R |
| <b>Area of medical care</b>     |                                                                                                                                                                                                                 |         |   |   |   |
| Vision                          | Visual test[20]                                                                                                                                                                                                 | X       |   |   |   |
|                                 | Questionnaire for individual rating of vision and use of visual aids                                                                                                                                            |         | X | X |   |
|                                 | Chart review for vision-related diagnoses (e.g. age-related macular degeneration, cataract) and relevant comorbidities (e.g. diabetes mellitus)                                                                 |         |   |   | X |
| Hearing                         | Whispered voice test[21]                                                                                                                                                                                        | X       |   |   |   |
|                                 | Questionnaire for individual rating of hearing and use of hearing devices                                                                                                                                       |         | X | X |   |
|                                 | Chart review for hearing-related diagnoses (e.g. presbycusis)                                                                                                                                                   |         |   |   | X |
| Oral health                     | Oral Health Assessment Tool (OHAT)[22] and Oral Health Impact Profile (OHIP)[23]                                                                                                                                | X       |   |   |   |
|                                 | Questionnaire for individual rating of dental problems as well as availability and use of dentures                                                                                                              |         | X | X |   |
|                                 | Chart review for oral health-related diagnoses (e.g. gingivitis)                                                                                                                                                |         |   |   | X |
| Parkinson’s disease             | Chart review for diagnosis of Parkinson’s disease, prescribed medications and contacts to medical specialists (e.g. neurologists) and/or therapists (e.g. physiotherapists)                                     |         |   |   | X |
| <b>General health status</b>    |                                                                                                                                                                                                                 |         |   |   |   |
| Health-related quality of life  | Short-Form Health Survey (SF-12)[24]                                                                                                                                                                            |         | X | X |   |
| Depression                      | Geriatric Depression Scale (GDS)[25,26]                                                                                                                                                                         |         | X |   |   |
|                                 | Cornell Scale for Depression in Dementia (CSDD)[27]                                                                                                                                                             |         |   |   | X |
| Functional and cognitive status | Mini-Mental State Examination[28]                                                                                                                                                                               |         | X |   |   |
|                                 | Extended Barthel-Index[29]                                                                                                                                                                                      |         |   |   | X |
| Nutrition                       | Mini-Nutritional Assessment Short Form (MNA-SF)[30-33]                                                                                                                                                          |         |   |   | X |
| Vital signs                     | Chart review for vital signs and falls                                                                                                                                                                          |         |   |   | X |
| Level of care                   | Chart review for level of care                                                                                                                                                                                  |         |   |   | X |
| <b>Additional data</b>          |                                                                                                                                                                                                                 |         |   |   |   |
| Utilization of medical care     | Questionnaire and chart review for diagnoses, prescriptions of medication and aids, contacts to and organization of general and specialized care, hospitalization, contacts to duty doctors and emergency calls |         |   | X | X |
| Sociodemographic data           | Questionnaire and chart review for age, sex, education, marital status, migrant status and relatives                                                                                                            |         |   | X | X |
| Nursing home characteristics    | Questionnaire** for size, number of employees and residents, location-related information                                                                                                                       |         |   |   | X |

\*E = examinations of residents; S = self-assessed by residents; P = proxy-assessed by residents’ care nurses; R = reviewed in medical charts  
\*\* This questionnaire is completed by administrative employees of the respective nursing home.

1  
2  
3 216 Additionally, health-related aspects (e.g. quality of life and depression) are assessed as well as  
4  
5 217 structural factors relating to the participating nursing homes (e.g. numbers of employees and  
6  
7 218 residents) that may act as explanatory variables of medical care.

8  
9  
10 219 Based on these data, a geriatrician and a GP jointly determine case by case whether or not  
11  
12 220 medical care needs in the areas of vision, hearing, oral health and Parkinson's disease are met.  
13  
14 221 In cases of uncertainties or discrepancies, geriatricians and GPs may decide to consult a  
15  
16 222 medical specialist of the corresponding field (i.e. an ophthalmologist, an ear, nose and throat  
17  
18 223 (ENT) specialist, a dentist or a neurologist) who independently determines whether or not  
19  
20 224 medical care needs in the respective area are met. The process of evaluating met and unmet  
21  
22 225 medical care needs is based on standardized guidelines and is tested and adjusted before final  
23  
24 226 application. All physicians are trained on how to evaluate met and unmet medical care needs.  
25  
26 227 Intercoder reliability is assessed for a subsample of 50 nursing home residents.  
27  
28  
29  
30

31 228

### 32 33 229 **Step 3: Expert interviews and case conferences**

34  
35 230 Semi-structured expert interviews and case conferences are used to identify structural and  
36  
37 231 case-specific explanations of inappropriate medical care provision in nursing homes. Expert  
38  
39 232 interviews are conducted with nursing home staff, physicians, people in need for long-term  
40  
41 233 care and informal caregivers who provide informed consent. The number of interviews is  
42  
43 234 determined by the principal of theoretical saturation. All interviews are recorded on tape,  
44  
45 235 transcribed and analyzed using content analysis.[34] The results provide a framework for the  
46  
47 236 subsequent case conferences, which are conducted for a selected subsample of nursing home  
48  
49 237 residents assessed in step 2.

50  
51  
52 238 The case conferences are held with the consenting nurses and, where necessary, the  
53  
54 239 consenting physicians and other health professionals involved in the provision of nursing and  
55  
56 240 medical care of the respective resident. Twenty residents with appropriate medical care and  
57  
58 241 twenty residents with inappropriate medical care are randomly selected for each field of  
59  
60

1  
2  
3 242 medical care (i.e. vision, hearing, oral health and Parkinson's disease). The case conferences  
4  
5 243 are based on a summarized presentation of the health status and medical care provision of the  
6  
7 244 respective resident. Using problem-centered group interviews,[35] the conference members  
8  
9  
10 245 then discuss, case by case, factors that foster or inhibit the provision of needs-based medical  
11  
12 246 care.

13  
14  
15 247

#### 16 17 248 **Step 4: Analysis of linked data, non-response analysis and extrapolation**

18  
19 249 In step 4, primary data assessed in step 2 and SHI claims data covering the years 2014-2018  
20  
21 250 are linked at the individual level. The linked data are analyzed to identify generalizable  
22  
23 251 factors that impact the provision of medical care:

24  
25 252 First, retrospective and prospective regression analyses are conducted. Retrospective analyses  
26  
27 253 are used to identify factors in the utilization of medical care that impact the quantified met  
28  
29 254 and unmet medical care needs of nursing home residents. Prospective analyses are used to  
30  
31 255 investigate the impact of the standardized assessment conducted in step 2 on the utilization of  
32  
33 256 medical care.

34  
35  
36  
37 257 Next, a non-response analysis is conducted. SHI claims data of 1,800 residents are analyzed to  
38  
39 258 identify systematic differences between responders and non-responders. Chi-square tests are  
40  
41 259 used to identify differences in the distribution of age groups, sex, morbidity and long-term  
42  
43 260 care levels. Differences in the mean duration of stays in long-term care and nursing homes are  
44  
45 261 identified using t-tests.

46  
47  
48  
49 262 Third, prevalence of met and unmet medical care needs is extrapolated. Controlling for  
50  
51 263 systematic differences between responders and non-responders identified in the non-response  
52  
53 264 analysis, prevalence of met and unmet medical care needs is projected to all nursing home  
54  
55 265 residents insured by the AOK Bremen/Bremerhaven. Using official statistics, systematic  
56  
57 266 differences in the distribution of age groups, sex and long-term care levels between nursing  
58  
59  
60 267 home residents insured by the AOK Bremen/Bremerhaven and the total population of nursing

1  
2  
3 268 home residents in the federal state of Bremen are identified. Taking into account identified  
4  
5 269 differences, the prevalence of met and unmet medical care needs is then projected to all  
6  
7 270 nursing home residents of Bremen. Finally, the prevalence is projected to all nursing home  
8  
9 271 residents of Germany controlling for identifiable differences in the distribution of age groups,  
10  
11 272 sex and long-term care levels between nursing home residents in Bremen and Germany.  
12  
13  
14  
15 273

### 16 17 274 **Step 5: Modified Delphi study and pilot projects**

18  
19 275 Based on the factors identified that may explain inappropriate medical care in steps 3 and 4, a  
20  
21 276 modified Delphi study is then carried out. The technique is used with stakeholders from the  
22  
23 277 fields of nursing and medical care and comprises three rounds. The first round is based on  
24  
25 278 face-to-face focus group discussions, while the second and third rounds each consist of semi-  
26  
27 279 structured online surveys. Each survey takes about 20 minutes to complete and is online for  
28  
29 280 up to 2 weeks.

30  
31  
32  
33 281 In the first round, a convenience sample of homogeneous and heterogeneous focus groups of  
34  
35 282 consenting stakeholders (i.e., nursing home staff, GPs, medical specialist, SHI employees,  
36  
37 283 nursing home residents and relatives) generate ideas on how medical care provision to nursing  
38  
39 284 home residents can be improved. The focus groups are led by experienced project researchers,  
40  
41 285 who feed the results of steps 3 and 4 into the discussions. Based on the ideas generated, the  
42  
43 286 project researchers draft at least two pilot projects.

44  
45  
46  
47 287 In the second round, the experts are given descriptions of these potential pilot projects and  
48  
49 288 rate them with respect to their feasibility and effectiveness for improving medical care of  
50  
51 289 nursing home residents. These ratings are summarized and distributed back to all experts.

52  
53 290 In the third round, the experts re-rate the projects based on the rating results from the previous  
54  
55 291 round. This is expected to result in a more consensual decision. Taking the results of this last  
56  
57 292 round into account, the concept of the pilot projects is revised and at least two pilot projects  
58  
59 293 are implemented simultaneously in one nursing home to test for practicability. To minimize  
60

1  
2  
3 294 the risk of contamination effects, the pilot projects are implemented in different areas of the  
4  
5 295 nursing home. A systematic evaluation of the pilot projects is planned in a follow-up study.  
6  
7  
8 296

9  
10 297 **Patient and public involvement**

11  
12 298 Nursing home residents and the public were not involved in the development of the research  
13  
14 299 question and outcome measures as well as in the design of and the recruitment to the study.  
15  
16  
17 300 Nursing home residents are involved in the standardized assessments of vision, hearing, oral  
18  
19 301 health, health-related quality of life, depression as well as functional and cognitive status  
20  
21 302 (self-assessments). Furthermore, nursing home residents and relatives are involved in the  
22  
23 303 expert interviews, the modified Delphi study and the development of pilot projects. The  
24  
25 304 results of the standardized assessment are summarized and disseminated to the participating  
26  
27 305 nursing homes (i.e. the results are not directly disseminated to the participating residents). The  
28  
29 306 results of the expert interviews, the modified Delphi study and the development of pilot  
30  
31 307 projects are disseminated to the participating nursing home residents and relatives.  
32  
33  
34  
35 308

36  
37 309 **Discussion**

38  
39  
40 310 This mixed-methods study broadens the limited evidence on the needs-based provision of  
41  
42 311 medical care in nursing homes. It systematically assesses, evaluates and explains met and  
43  
44 312 unmet medical care needs in nursing homes and takes first steps toward improvement.  
45  
46  
47 313 Up to now, several studies have described differences in the utilization of medical care  
48  
49 314 between nursing home residents and community-dwelling elderly with and without need for  
50  
51 315 long-term care.[2,36-38] None of these, however, has evaluated whether such differences  
52  
53 316 reflect unmet medical care needs at the individual level. Neither have differences in the  
54  
55 317 utilization of medical care been explained by prevailing structures that may be changed.  
56  
57  
58 318 The present mixed-methods study addresses this evidence gap: Based on longitudinal SHI  
59  
60 319 claims data, cross-sectional data collected in nursing homes as well as transcripts of expert

1  
2  
3 320 interviews and case conferences, differences in the utilization of medical care are identified,  
4  
5 321 met and unmet medical care needs are quantified, explanations of inappropriate provision of  
6  
7 322 medical care are provided and pilot projects are developed aiming to improve the provision of  
8  
9  
10 323 medical care where it is found to be inappropriate. Participatory approaches involve GPs,  
11  
12 324 medical specialists, nursing home staff, SHI employees, nursing home residents and relatives.  
13  
14 325 This is expected to result in strong acceptance and effective pilot projects which will be  
15  
16 326 systematically evaluated in a follow-up study.  
17  
18 327 There are, however, some limitations to consider. First, in the present study, all nursing homes  
19  
20 328 in the federal state of Bremen are invited to participate and to recruit nursing home residents  
21  
22 329 for study participation. Differences in the willingness to participate among nursing homes and  
23  
24 330 nursing home residents may result in a selective study population. The claims-based non-  
25  
26 331 response analysis, however, permits the identification of structural differences between  
27  
28 332 participants and non-participants. Second, the study focuses on nursing homes located in the  
29  
30 333 federal state of Bremen and members of one local SHI fund. Therefore, the generalizability of  
31  
32 334 research findings may be limited.  
33  
34  
35 335 In conclusion, the findings from this study enhance our knowledge of met and unmet medical  
36  
37 336 care needs in nursing homes. The pilot projects provide a first step towards a sustainable  
38  
39 337 improvement of medical care in German nursing homes. Therefore, it is expected that the  
40  
41 338 findings are highly relevant for many stakeholders from the fields of nursing and medical  
42  
43 339 care.  
44  
45  
46  
47  
48  
49  
50

340

### 341 **Ethics and dissemination**

342 The Ethics Committee of the University of Bremen approved this study on November 23,  
343 2017. All eligible nursing home residents and all nursing home staff are informed in detail  
344 about the study. Informed consent is obtained from all included nursing home residents (or  
345 their legal guardians where applicable). Informed consent is also obtained from all persons

1  
2  
3 346 included in the expert interviews, case conferences and Delphi study. Dissemination strategies  
4  
5 347 include presentations at national and international conferences and publications in peer-  
6  
7 348 reviewed scientific journals.  
8  
9

10 349

## 11 350 **Acknowledgements**

12  
13  
14 351 We are grateful to the AOK Bremen/Bremerhaven for the provision of longitudinal SHI  
15  
16 352 claims data as well as to the Bremer Heimstiftung, the Bundesverband privater Anbieter  
17  
18 353 sozialer Dienste e.V., the LandesArbeitsGemeinschaft der Freien Wohlfahrtspflege Bremen  
19  
20 354 e.V. and the Hausärzteverband Bremen for their cooperation. Furthermore, we are grateful to  
21  
22 355 the participating nursing homes, nursing home residents, physicians, relatives, study nurses,  
23  
24 356 student assistants and Statutory Health Insurance employees as well as to Vicki May for  
25  
26 357 proofreading this protocol.  
27  
28  
29

30 358

## 31 359 **Footnotes**

32  
33  
34 360 **Contributors:** JC, TK, ASchw, GS, KW-O, AG and HR designed the study. MS, TK, CT,  
35  
36 361 ASchw and HR specified the analysis of longitudinal SHI claims data. MS, FH, DK, ASchm,  
37  
38 362 SK, GS, KW-O, AG and HR specified the collection of cross-sectional primary data. JC, MS,  
39  
40 363 FH, DG, ASchm, CT, ASchw and SK wrote the first draft of the protocol which was critically  
41  
42 364 revised by TK, GS, KW-O, AG and HR. All authors approved the final version of the  
43  
44 365 protocol.  
45  
46

47  
48  
49 366 **Funding:** This work was supported by the Innovation Committee at the Federal Joint  
50  
51 367 Committee (grant number 01VSF16039).  
52

53  
54 368 **Competing interests:** None declared.  
55

56 369  
57  
58  
59  
60



1  
2  
3 370 **Figures**  
4

5  
6 371 See separate file (Figure\_1.jpg)  
7

8 372 **Figure 1 Conceptual framework of the mixed-methods study**  
9

10 373  
11

12 374  
13

14 375  
15

16 376  
17

18 377  
19

20 378  
21

22 379  
23

24 380  
25

26 381  
27

28 382  
29

30 383  
31

32 384  
33

34 385  
35

36 386  
37

38 387  
39

40 388  
41

42 389  
43

44 390  
45

46 391  
47

48 392  
49

50 393  
51

52 394  
53

54 395  
55  
56  
57  
58  
59  
60

For peer review only

396 **References**

- 397 1 Iliffe S, Davies SL, Gordon AL, et al. Provision of NHS generalist and specialist services to  
398 care homes in England: review of surveys. *Prim Health Care Res Dev* 2016;17(2):122-37.
- 399 2 Balzer K, Butz S, Bentzel J, et al. Medical specialist attendance in nursing homes. *GMS*  
400 *Health Technol Assess* 2013;9:Doc02.
- 401 3 Burns E, Nair S. New horizons in care home medicine. *Age Ageing* 2014;43(1):2-7.
- 402 4 Briggs R, Holmerová I, Martin FC, et al. Towards standards of medical care for physicians  
403 in nursing homes. *Eur Geriatr Med* 2015;6(4):401-3.
- 404 5 Gordon AL, Franklin M, Bradshaw L, et al. Health status of UK care home residents: a  
405 cohort study. *Age Ageing* 2014;43(1):97-103.
- 406 6 Björk S, Juthberg C, Lindkvist M, et al. Exploring the prevalence and variance of cognitive  
407 impairment, pain, neuropsychiatric symptoms and ADL dependency among persons living in  
408 nursing homes; a cross-sectional study. *BMC Geriatr* 2016;16:154.
- 409 7 Tolson D, Rolland Y, Andrieu S, et al. International Association of Gerontology and  
410 Geriatrics: a global agenda for clinical research and quality of care in nursing homes. *J Am*  
411 *Med Dir Assoc* 2011;12(3):184-9.
- 412 8 Thibault L, Kergoat H. Eye care services for older institutionalised individuals affected by  
413 cognitive and visual deficits: a systematic review. *Ophthalmic Physiol Opt* 2016;36(5):566-  
414 83.
- 415 9 Yamada Y, Vlachova M, Richter T, et al. Prevalence and correlates of hearing and visual  
416 impairments in European nursing homes: results from the SHELTER study. *J Am Med Dir*  
417 *Assoc* 2014;15(10):738-43.
- 418 10 Cohen-Mansfield J, Infeld DL. Hearing aids for nursing home residents: current policy and  
419 future needs. *Health Policy* 2006;79(1):49-56.

- 1  
2  
3 420 11 Zenthöfer A, Rammelsberg P, Cabrera T, et al. Increasing dependency of older people in  
4  
5 421 nursing homes is associated with need for dental treatments. *Neuropsychiatr Dis Treat*  
6  
7 422 2014;10:2285-90.  
8  
9  
10 423 12 Müller F, Naharro M, Carlsson GE. What are the prevalence and incidence of tooth loss in  
11  
12 424 the adult and elderly population in Europe? *Clin Oral Impl Res* 2007;18 Suppl 3:2-14.  
13  
14 425 13 Lukas A, Mayer B, Onder G, et al. [Pain therapy in German long-term care facilities in a  
15  
16 426 European comparison. Results of the SHELTER study]. *Schmerz* 2015;29(4):411-21.  
17  
18 427 14 Storms H, Marquet K, Aertgeerts B, et al. Prevalence of inappropriate medication use in  
19  
20 428 residential long-term care facilities for the elderly: a systematic review. *Eur J Gen Pract*  
21  
22 429 2017;23(1):69-77.  
23  
24  
25 430 15 Dörks M, Allers K, Schmiemann G, et al. Inappropriate medication in non-hospitalized  
26  
27 431 patients with renal insufficiency: a systematic review. *J Am Geriatr Soc* 2017;65(4):853-62.  
28  
29 432 16 Morin L, Laroche ML, Texier G, et al. Prevalence of potentially inappropriate medication  
30  
31 433 use in older adults living in nursing homes: a systematic review. *J Am Med Dir Assoc*  
32  
33 434 2016;17(9):862.e1-9.  
34  
35  
36 435 17 Johnell K. Inappropriate drug use in people with cognitive impairment and dementia: a  
37  
38 436 systematic review. *Curr Clin Pharmacol* 2015;10(3):178-84.  
39  
40  
41 437 18 Atramont A, Bourdel-Marchasson I, Bonnet-Zamponi D, et al. Impact of nursing home  
42  
43 438 admission on health care use and disease status elderly dependent people one year before and  
44  
45 439 one year after skilled nursing home admission based on 2012-2013 SNIIRAM data. *BMC*  
46  
47 440 *Health Serv Res* 2017;17(1):667.  
48  
49  
50 441 19 Atramont A, Bonnet-Zamponi D, Bourdel-Marchasson I, et al. Health status and drug use  
51  
52 442 1 year before and 1 year after skilled nursing home admission during the first quarter of 2013  
53  
54 443 in France: a study based on the French National Health Insurance Information System. *Eur J*  
55  
56 444 *Clin Pharmacol*. 2018;74(1):109-18.  
57  
58  
59  
60

- 1  
2  
3 445 20 Bailey IL, Lovie JE. New design principles for visual acuity letter charts. *Am J Optom*  
4  
5 446 *Physiol Opt* 1976;53(11):740-5.  
6  
7 447 21 Macphee GJ, Crowther JA, McAlpine CH. A simple screening test for hearing impairment  
8  
9 448 in elderly patients. *Age Ageing* 1988;17(5):347-51.  
10  
11  
12 449 22 Chalmers JM, King PL, Spencer AJ, et al. The Oral Health Assessment Tool--validity and  
13  
14 450 reliability. *Aust Dent J* 2005;50(3):191-9.  
15  
16  
17 451 23 John MT, Miglioretti DL, LeResche L, et al. German short forms of the Oral Health  
18  
19 452 Impact Profile. *Community Dent Oral Epidemiol* 2006;34(4):277-88.  
20  
21 453 24 Morfeld M, Kirchberger I, Bullinger M. SF-36. Fragebogen zum Gesundheitszustand:  
22  
23 454 Deutsche Version des Short Form - 36 Health Survey. Göttingen: Hogrefe; 2011.  
24  
25  
26 455 25 Yesavage JA, Brink TL, Rose TL, et al. Development and validation of a geriatric  
27  
28 456 depression screening scale: a preliminary report. *J Psychiatr Res* 1982;17(1):37-49.  
29  
30  
31 457 26 Allgaier AK, Kramer D, Mergl R, et al. [Validity of the geriatric depression scale in  
32  
33 458 nursing home residents: comparison of GDS-15, GDS-8, and GDS-4]. *Psychiatrische Praxis*  
34  
35 459 2011;38(6):280-6.  
36  
37  
38 460 27 Alexopoulos GS, Abrams RC, Young RC, et al. Cornell Scale for Depression in Dementia.  
39  
40 461 *Biol Psychiatry* 1988;23(3):271-84.  
41  
42  
43 462 28 Folstein MF, Folstein SE, McHugh PR. "Mini-mental state". A practical method for  
44  
45 463 grading the cognitive state of patients for the clinician. *J Psychiatr Res* 1975;12(3):189-98.  
46  
47 464 29 Prosiegel M, Böttger S, Schenk T, et al. Der Erweiterte Barthel-Index (EBI) - eine neue  
48  
49 465 Skala zur Erfassung von Fähigkeitsstörungen bei neurologischen Patienten. *Neurol Rehabil*  
50  
51 466 1996;2:7-13.  
52  
53  
54 467 30 Rubenstein LZ, Harker JO, Salvà A, et al. Screening for undernutrition in geriatric  
55  
56 468 practice: developing the short-form mini-nutritional assessment (MNA-SF). *J Gerontol A Biol*  
57  
58 469 *Sci Med Sci* 2001;56(6):M366-72.  
59  
60

- 1  
2  
3 470 31 Vellas B, Villars H, Abellan G, et al. Overview of the MNA--Its history and challenges. *J*  
4  
5 471 *Nutr Health Aging* 2006;10(6):456-63; discussion 463-5.  
6  
7 472 32 Guigoz Y. The Mini Nutritional Assessment (MNA) review of the literature--What does it  
8  
9 473 tell us? *J Nutr Health Aging* 2006;10(6):466-85; discussion 485-7.  
10  
11  
12 474 33 Kaiser MJ, Bauer JM, Ramsch C, et al. Validation of the Mini Nutritional Assessment  
13  
14 475 short-form (MNA-SF): a practical tool for identification of nutritional status. *J Nutr Health*  
15  
16 476 *Aging* 2009;13(9):782-8.  
17  
18 477 34 Kohlbacher F. The use of qualitative content analysis in case study research. *Forum: Qual*  
19  
20 478 *Soc Res* 2006; doi:10.17169/fqs-7.1.75.  
21  
22  
23 479 35 Witzel A. The problem-centered interview. *Forum: Qual Soc Res* 2000; doi:10.17169/fqs-  
24  
25 480 1.1.1132.  
26  
27  
28 481 36 Kleina T, Horn A, Suhr R, et al. [Current status of medical care for nursing home residents  
29  
30 482 in Germany - results of an empirical study]. *Gesundheitswesen* 2017;79(5):382-87.  
31  
32  
33 483 37 Schmiemann G, Herget-Rosenthal S, Hoffmann F. [Medical services for nursing home  
34  
35 484 residents : results of the study on inappropriate medication in patients with renal insufficiency  
36  
37 485 in nursing homes]. *Z Gerontol Geriatr* 2016;49(8):727-33.  
38  
39  
40 486 38 Pittrow D, Krappweis J, Rentsch A, et al. Pattern of prescriptions issued by nursing home-  
41  
42 487 based physicians versus office-based physicians for frail elderly patients in German nursing  
43  
44 488 homes. *Pharmacoepidemiol Drug Saf* 2003;12(7):595-9.  
45  
46  
47  
48  
49  
50  
51  
52  
53  
54  
55  
56  
57  
58  
59  
60

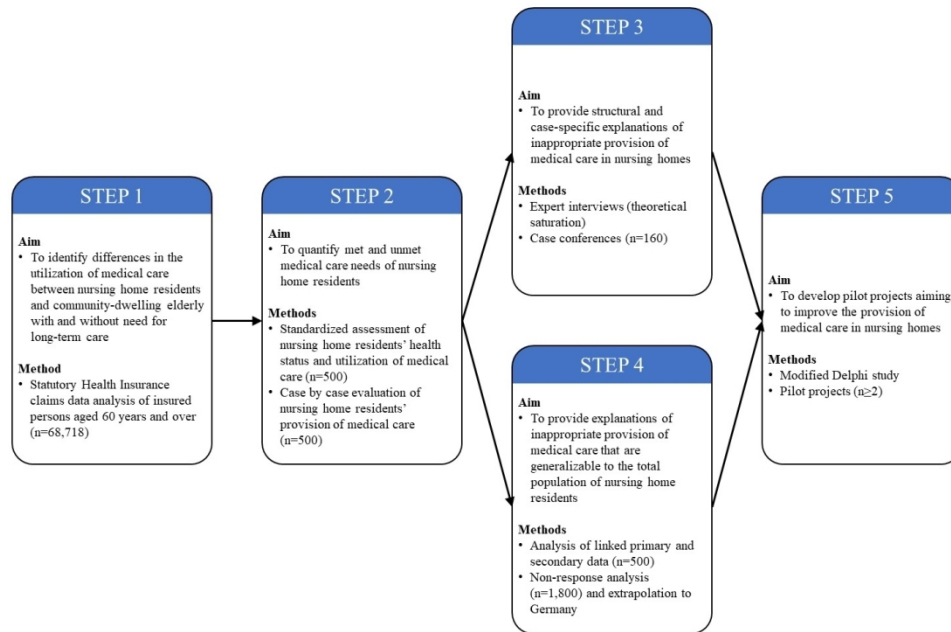

Figure 1 Conceptual framework of the mixed-methods study

128x96mm (300 x 300 DPI)

# BMJ Open

## Needs-based provision of medical care to nursing home residents: protocol for a mixed-methods study

|                                 |                                                                                                                                                                                                                                                                                                                                                                                                                                                                                                                                                                                                                                                                                                                                                                                                                                                                                                                                                                                                                                                                                                                                                                                                                                                                                                                                                                                                                                                                                                                                                                                                                                                                                                                                                                                                                                                                                                                                                                                                                                                                                                                                                                                                                                                                                                                                   |
|---------------------------------|-----------------------------------------------------------------------------------------------------------------------------------------------------------------------------------------------------------------------------------------------------------------------------------------------------------------------------------------------------------------------------------------------------------------------------------------------------------------------------------------------------------------------------------------------------------------------------------------------------------------------------------------------------------------------------------------------------------------------------------------------------------------------------------------------------------------------------------------------------------------------------------------------------------------------------------------------------------------------------------------------------------------------------------------------------------------------------------------------------------------------------------------------------------------------------------------------------------------------------------------------------------------------------------------------------------------------------------------------------------------------------------------------------------------------------------------------------------------------------------------------------------------------------------------------------------------------------------------------------------------------------------------------------------------------------------------------------------------------------------------------------------------------------------------------------------------------------------------------------------------------------------------------------------------------------------------------------------------------------------------------------------------------------------------------------------------------------------------------------------------------------------------------------------------------------------------------------------------------------------------------------------------------------------------------------------------------------------|
| Journal:                        | <i>BMJ Open</i>                                                                                                                                                                                                                                                                                                                                                                                                                                                                                                                                                                                                                                                                                                                                                                                                                                                                                                                                                                                                                                                                                                                                                                                                                                                                                                                                                                                                                                                                                                                                                                                                                                                                                                                                                                                                                                                                                                                                                                                                                                                                                                                                                                                                                                                                                                                   |
| Manuscript ID                   | bmjopen-2018-025614.R2                                                                                                                                                                                                                                                                                                                                                                                                                                                                                                                                                                                                                                                                                                                                                                                                                                                                                                                                                                                                                                                                                                                                                                                                                                                                                                                                                                                                                                                                                                                                                                                                                                                                                                                                                                                                                                                                                                                                                                                                                                                                                                                                                                                                                                                                                                            |
| Article Type:                   | Protocol                                                                                                                                                                                                                                                                                                                                                                                                                                                                                                                                                                                                                                                                                                                                                                                                                                                                                                                                                                                                                                                                                                                                                                                                                                                                                                                                                                                                                                                                                                                                                                                                                                                                                                                                                                                                                                                                                                                                                                                                                                                                                                                                                                                                                                                                                                                          |
| Date Submitted by the Author:   | 11-May-2019                                                                                                                                                                                                                                                                                                                                                                                                                                                                                                                                                                                                                                                                                                                                                                                                                                                                                                                                                                                                                                                                                                                                                                                                                                                                                                                                                                                                                                                                                                                                                                                                                                                                                                                                                                                                                                                                                                                                                                                                                                                                                                                                                                                                                                                                                                                       |
| Complete List of Authors:       | Czwikla, Jonas; University of Bremen, SOCIUM Research Center on Inequality and Social Policy, Department of Health, Long-term Care and Pensions; University of Bremen, High-Profile Area Health Sciences<br>Schulz, M; University of Bremen, SOCIUM Research Center on Inequality and Social Policy, Department of Health, Long-term Care and Pensions; University of Bremen, High-Profile Area Health Sciences<br>Heinze, Franziska; University of Bremen, SOCIUM Research Center on Inequality and Social Policy, Department of Health, Long-term Care and Pensions; University of Bremen, High-Profile Area Health Sciences<br>Kalwitzki, Thomas; University of Bremen, SOCIUM Research Center on Inequality and Social Policy, Department of Health, Long-term Care and Pensions; University of Bremen, High-Profile Area Health Sciences<br>Gand, Daniel; University of Bremen, Institute of Public Health and Nursing Research (IPP), Department for Health Services Research; University of Bremen, High-Profile Area Health Sciences<br>Schmidt, Annika; University of Bremen, Institute of Public Health and Nursing Research (IPP), Department for Health Care Research; University of Bremen, High-Profile Area Health Sciences<br>Tsiasioti, Chrysanthi; WIdO-AOK Research Institute<br>Schwinger, Antje; WIdO-AOK Research Institute<br>Kloep, Stephan; University of Bremen, Competence Center for Clinical Trials (KKSb); University of Bremen, High-Profile Area Health Sciences<br>Schmiemann, Guido; University of Bremen, Institute of Public Health and Nursing Research (IPP), Department for Health Services Research; Hannover Medical School, Institute for General Practice<br>Wolf-Ostermann, Karin; University of Bremen, Institute of Public Health and Nursing Research (IPP), Department for Health Care Research; University of Bremen, High-Profile Area Health Sciences<br>Gerhardus, Ansgar; University of Bremen, Institute of Public Health and Nursing Research (IPP), Department for Health Services Research; University of Bremen, High-Profile Area Health Sciences<br>Rothgang, Heinz; University of Bremen, SOCIUM Research Center on Inequality and Social Policy, Department of Health, Long-term Care and Pensions; University of Bremen, High-Profile Area Health Sciences, Bremen |
| <b>Primary Subject Heading</b>: | Health services research                                                                                                                                                                                                                                                                                                                                                                                                                                                                                                                                                                                                                                                                                                                                                                                                                                                                                                                                                                                                                                                                                                                                                                                                                                                                                                                                                                                                                                                                                                                                                                                                                                                                                                                                                                                                                                                                                                                                                                                                                                                                                                                                                                                                                                                                                                          |
| Secondary Subject Heading:      | Geriatric medicine, Ophthalmology, Ear, nose and throat/otolaryngology, Dentistry and oral medicine, Neurology                                                                                                                                                                                                                                                                                                                                                                                                                                                                                                                                                                                                                                                                                                                                                                                                                                                                                                                                                                                                                                                                                                                                                                                                                                                                                                                                                                                                                                                                                                                                                                                                                                                                                                                                                                                                                                                                                                                                                                                                                                                                                                                                                                                                                    |

1  
2  
3  
4  
5  
6  
7  
8  
9  
10  
11  
12  
13  
14  
15  
16  
17  
18  
19  
20  
21  
22  
23  
24  
25  
26  
27  
28  
29  
30  
31  
32  
33  
34  
35  
36  
37  
38  
39  
40  
41  
42  
43  
44  
45  
46  
47  
48  
49  
50  
51  
52  
53  
54  
55  
56  
57  
58  
59  
60

|           |                                                                                                |
|-----------|------------------------------------------------------------------------------------------------|
| Keywords: | Medical care, Nursing homes, Needs assessment, Administrative claims, Health services research |
|           |                                                                                                |

SCHOLARONE™  
Manuscripts



1  
2  
3 1 **Needs-based provision of medical care to nursing home residents: protocol for a**  
4  
5  
6 2 **mixed-methods study**

7  
8 3 Jonas Czwikla<sup>1,7</sup>, Maike Schulz<sup>1,7</sup>, Franziska Heinze<sup>1,7</sup>, Thomas Kalwitzki<sup>1,7</sup>, Daniel Gand<sup>2,7</sup>,  
9  
10 4 Annika Schmidt<sup>3,7</sup>, Chrysanthi Tsiasioti<sup>4</sup>, Antje Schwinger<sup>4</sup>, Stephan Kloep<sup>5,7</sup>, Guido  
11  
12 5 Schmiemann<sup>2,6,7</sup>, Karin Wolf-Ostermann<sup>3,7</sup>, Ansgar Gerhardus<sup>2,7</sup>, Heinz Rothgang<sup>1,7</sup>

13  
14  
15 6 <sup>1</sup> University of Bremen, SOCIUM Research Center on Inequality and Social Policy,  
16  
17 7 Department of Health, Long-term Care and Pensions, Mary-Somerville-Straße 5, 28359  
18  
19 8 Bremen, Germany

20  
21  
22 9 <sup>2</sup> University of Bremen, Institute of Public Health and Nursing Research (IPP), Department  
23  
24 10 for Health Services Research, Grazer Straße 4, 28359 Bremen, Germany

25  
26  
27 11 <sup>3</sup> University of Bremen, Institute of Public Health and Nursing Research (IPP), Department  
28  
29 12 for Health Care Research, Grazer Straße 4, 28359 Bremen, Germany

30  
31 13 <sup>4</sup> WIdO-AOK Research Institute, Rosenthaler Str. 31, 10178 Berlin, Germany

32  
33  
34 14 <sup>5</sup> University of Bremen, Competence Center for Clinical Trials (KKSb), Linzer Straße 4,  
35  
36 15 28359 Bremen, Germany

37  
38 16 <sup>6</sup> Hannover Medical School, Institute for General Practice, Carl-Neuberg-Straße 1, 30625  
39  
40 17 Hannover, Germany

41  
42 18 <sup>7</sup> University of Bremen, High-Profile Area Health Sciences, Bremen, Germany  
43  
44  
45 19

46  
47 20 **Corresponding author:**

48  
49 21 Jonas Czwikla, M.A. (czwikla@uni-bremen.de)

50  
51 22 University of Bremen, SOCIUM Research Center on Inequality and Social Policy

52  
53 23 Mary-Somerville-Straße 5, 28359 Bremen, Germany

54  
55 24 Phone: +49 (0)421 218 58633  
56  
57  
58  
59 25  
60

1  
2  
3 **26 Co-authors:**  
4

5 27 Dr. Maïke Schulz (maïke.schulz@uni-bremen.de)  
6

7 28 Franziska Heinze, M.Sc. (fheinze@uni-bremen.de)  
8

9 29 Dipl.-Geront. Thomas Kalwitzki (thomas.kalwitzki@uni-bremen.de)  
10

11 30 Daniel Gand, M.A. (daniel.gand@uni-bremen.de)  
12

13 31 Annika Schmidt, M.Sc. (schmidt.annika@uni-bremen.de)  
14

15 32 Chrysanthi Tsiasioti (Chrysanthi.Tsiasioti@wido.bv.aok.de)  
16

17 33 Dr. Antje Schwinger (antje.schwinger@wido.bv.aok.de)  
18

19 34 Dr. Stephan Kloep (kloep@math.uni-bremen.de)  
20

21 35 PD Dr. Guido Schmiemann (schmiema@uni-bremen.de)  
22

23 36 Prof. Dr. Karin Wolf-Ostermann (wolf-ostermann@uni-bremen.de)  
24

25 37 Prof. Dr. Ansgar Gerhardus (ansgar.gerhardus@uni-bremen.de)  
26

27 38 Prof. Dr. Heinz Rothgang (rothgang@uni-bremen.de)  
28

29 39  
30

31 **40 Word count: 3,181**  
32

33 41  
34

35 42  
36

37 43  
38

39 44  
40

41 45  
42

43 46  
44

45 47  
46

47 48  
48

49 49  
50

51 50  
52

53 51  
54  
55  
56  
57  
58  
59  
60

1  
2  
3 **52 Abstract**  
4

5 **53 Introduction** Nursing home residents typically have greater needs for medical care than  
6  
7  
8 **54** community-dwelling elderly. However, restricted cognitive abilities and limited mobility may  
9  
10 **55** impede their access to general practitioners and medical specialists. The provision of medical  
11  
12 **56** care in nursing homes may therefore be inappropriate in some areas of medical care. The  
13  
14 **57** purpose of this mixed-methods study is to systematically assess, evaluate and explain met and  
15  
16 **58** unmet medical care needs in German nursing homes and to develop solutions where medical  
17  
18 **59** care is found to be inappropriate.

19  
20  
21 **60 Methods and analysis** First, Statutory Health Insurance claims data are analyzed to identify  
22  
23 **61** differences in the utilization of medical care between nursing home residents and community-  
24  
25 **62** dwelling elderly with and without need for long-term care. Second, the health status and  
26  
27 **63** medical care of 500 nursing home residents are assessed and evaluated to quantify met and  
28  
29 **64** unmet medical care needs. Third, qualitative expert interviews and case conferences and,  
30  
31 **65** fourth, quantitative analyses of linked data are used to provide structural, case-specific and  
32  
33 **66** generalizable explanations of inappropriate medical care among nursing home residents.  
34  
35 **67** Fifth, a modified Delphi study is employed to develop pilot projects aiming to improve  
36  
37 **68** medical care in nursing homes.

38  
39  
40 **69 Ethics and dissemination** This study was approved by the Ethics Committee of the  
41  
42 **70** University of Bremen. Research findings are disseminated through presentations at national  
43  
44 **71** and international conferences and publications in peer-reviewed scientific journals.

45  
46  
47 **72 Trial registration number** DRKS00012383  
48  
49  
50  
51  
52  
53  
54  
55  
56  
57  
58  
59  
60  
61  
62  
63  
64  
65  
66  
67  
68  
69  
70  
71  
72  
73  
74  
75  
76  
77

1  
2  
3 78 **Article Summary**  
4

5 79 **Strengths and limitations of this study**  
6  
7

- 8 80 • Based on longitudinal Statutory Health Insurance claims data, cross-sectional data  
9  
10 81 collected in nursing homes, expert interviews and case conferences the provision of  
11  
12 82 medical care is analyzed for the first time in relation to individual medical care needs  
13  
14 83 among nursing home residents in Germany.  
15  
16  
17 84 • The mixed-methods designs allows a comprehensive assessment, evaluation and  
18  
19 85 explanation of met and unmet medical care needs in nursing homes.  
20  
21  
22 86 • Participatory approaches involving general practitioners, medical specialists, nursing  
23  
24 87 home staff, Statutory Health Insurance employees, nursing home residents and  
25  
26 88 relatives are used to increase the acceptance and effectiveness of pilot projects to be  
27  
28 89 developed to improve medical care where it is found to be inappropriate.  
29  
30  
31 90 • Differences in the willingness to participate among nursing homes and nursing home  
32  
33 91 residents may result in a selective study population.  
34  
35  
36 92 • Focusing on nursing homes located in the federal state of Bremen and members of one  
37  
38 93 local Statutory Health Insurance fund may limit the generalizability of the study  
39  
40 94 results.  
41  
42  
43 95  
44  
45 96  
46  
47 97  
48  
49 98  
50  
51  
52 99  
53  
54 100  
55  
56 101  
57  
58 102  
59  
60

## 103 **Introduction**

104 Nursing home residents may not receive appropriate medical care since restricted cognitive  
105 abilities and limited mobility may impede their access to general practitioners (GPs) and  
106 medical specialists.[1-3] Moreover, nursing home residents typically suffer from  
107 multimorbidity, frailty, cognitive impairments and polypharmacy, resulting in diverse medical  
108 care needs that compound the challenge of providing appropriate medical care.[4-7]  
109 Empirical studies support this view, indicating inappropriate medical care provision in  
110 nursing homes for the treatment of visual and hearing impairments,[8-10] oral health  
111 care,[1,2,11,12] pain treatment[13] and drug prescriptions.[2,14-17] Atramont et al.,  
112 furthermore, found nursing home admission to be negatively associated with some forms of  
113 outpatient care[18] and positively associated with psychotropic and antibacterial drug use.[19]  
114 There is, however, hardly any empirical evidence on explanations of inappropriate medical  
115 care provision in nursing homes. In this regard, a health technology assessment report  
116 concluded that there is not sufficient data available to allow recommendations to be drawn on  
117 how medical care provision in German nursing homes can be improved.[2]  
118 Given this lack of evidence, the proposed research project aims to systematically assess,  
119 evaluate and explain met and unmet medical care needs in German nursing homes and to  
120 develop solutions where medical care is found to be inappropriate. The specific aims are: (1)  
121 to identify differences in the utilization of medical care between a) nursing home residents, b)  
122 community-dwelling elderly in need for long-term care and c) community-dwelling elderly  
123 without need for long-term care; (2) to quantify met and unmet medical care needs of nursing  
124 home residents; (3) to provide structural and case-specific explanations of inappropriate  
125 medical care provision in nursing homes; (4) to provide explanations of inappropriate medical  
126 care provision that are generalizable to the total population of nursing home residents; and (5)  
127 to develop pilot projects aiming to improve medical care provision in nursing homes.

## 128 **Methods and analysis**

129 This mixed-methods study is running from April 1, 2017 to March 31, 2020. It is structured  
130 into five steps (figure 1). In step 1, Statutory Health Insurance (SHI) claims data are analyzed  
131 in order to identify differences in the utilization of medical care between nursing home  
132 residents and community-dwelling elderly with and without the need for long-term care. Such  
133 differences in the utilization of medical care may indicate, but not prove, inappropriate  
134 medical care provision in nursing homes. Thus, in step 2, nursing home residents' health  
135 status and utilization of medical care are assessed and evaluated to quantify met and unmet  
136 medical care needs with respect to vision, hearing, oral health and Parkinson's disease. In  
137 steps 3 and 4, qualitative expert interviews and case conferences as well as quantitative  
138 methods are used to provide structural, case-specific and generalizable explanations of  
139 inappropriate medical care in nursing homes. In step 5, a modified Delphi study is used to  
140 generate ideas on how to improve the provision of medical care in nursing homes.  
141 Consequently, at least two pilot projects are developed and implemented in one nursing home  
142 to test for practicability. In the following sections, each step is described in detail.

143

### 144 **Step 1: Analysis of SHI claims data**

145 SHI claims data from AOK Bremen/Bremerhaven, a local SHI fund, are analyzed to identify  
146 differences in the utilization of medical care that indicate inappropriate medical care provision  
147 in German nursing homes. The available data comprise information on sex, age, in- and  
148 outpatient care as well as on long-term care use of 245,000 insured persons (i.e. 34.7% of the  
149 total population in the federal state of Bremen). The data represent 51.8% of the population of  
150 community-dwelling individuals with need for long-term care and 54.9% of the population of  
151 nursing home residents in Bremen. All diagnoses are coded according to the German  
152 Modification of the International Classification of Diseases, 10th Revision (ICD-10-GM) and  
153 can be differentiated according to GPs and medical specialties in the outpatient setting. In

1  
2  
3 154 Germany, the Federal Joint Committee defines which services are reimbursed by the SHI  
4  
5 155 ensuring that all SHI insured persons are treated according to the current standard of care.[20]  
6  
7 156 SHI claims data comprise all diagnoses coded by physicians for reimbursement purposes of  
8  
9 157 services with clear benefits. Services with unclear benefits, which have to be paid out of  
10  
11 158 pocket, are not included.  
12  
13 159 From the 245,000 insured persons, a subsample of 68,718 insured persons aged 60 years and  
14  
15 160 over is drawn. Insured persons with missing or invalid information on demographic  
16  
17 161 characteristics (n = 124) are not considered. For this subsample, the morbidity status of each  
18  
19 162 insured person is defined by 31 disease categories related to at least one of 13 examined  
20  
21 163 medical specialties (table 1).  
22  
23  
24  
25  
26  
27  
28  
29  
30  
31  
32

33  
34  
35  
36  
37  
38  
39  
40  
41  
42  
43  
44  
45  
46  
47  
48  
49  
50  
51  
52  
53  
54  
55  
56  
57  
58  
59  
60

**Table 1 Disease categories and related medical specialties used to define the individual morbidity status of insured persons examined in step 1**

| No. | Disease categories                                                                                  | ICD-10-GM 2015 codes        | Related medical specialties*            |
|-----|-----------------------------------------------------------------------------------------------------|-----------------------------|-----------------------------------------|
| 01  | Hypertensive diseases                                                                               | I10-I15                     | Internal medicine, cardiology           |
| 02  | Ischemic heart diseases                                                                             | I20-I52                     | Internal medicine, cardiology           |
| 03  | Metabolic disorders                                                                                 | E70-E90                     | Internal medicine                       |
| 04  | Arthropathies                                                                                       | M00-M25                     | Internal medicine, orthopedics          |
| 05  | Diabetes mellitus                                                                                   | E10-E14                     | Internal medicine                       |
| 06  | Dorsopathies                                                                                        | M40-M54                     | Orthopedics                             |
| 07  | Disorders of thyroid gland                                                                          | E00-E07                     | Internal medicine                       |
| 08  | Vascular diseases                                                                                   | I70-I89                     | Internal medicine, cardiology           |
| 09  | Organic, including symptomatic, mental disorders; other degenerative diseases of the nervous system | F00-F09; G30-G32            | Neurology/psychiatry                    |
| 10  | Diseases of esophagus, stomach and duodenum; hernia; other diseases of intestines                   | K20-K31; K40-K46; K55-K64   | Internal medicine                       |
| 11  | Chronic lower respiratory diseases                                                                  | J40-J47                     | Internal medicine, pulmonology          |
| 12  | Mood (affective) disorders                                                                          | F30-F39                     | Neurology/psychiatry                    |
| 13  | Cerebrovascular diseases                                                                            | I60-I69                     | Internal medicine, neurology/psychiatry |
| 14  | Neurotic, stress-related and somatoform disorders                                                   | F40-F48                     | Neurology/psychiatry                    |
| 15  | Symptoms and signs involving the urinary system; other diseases of urinary system                   | R30-R39; N30-N39            | Gynecology, urology                     |
| 16  | Diseases of the eye and adnexa                                                                      | H00-H59                     | Ophthalmology                           |
| 17  | Renal failure                                                                                       | N17-N19                     | Internal medicine, nephrology           |
| 18  | Osteopathies and chondropathies                                                                     | M80-M94                     | Orthopedics                             |
| 19  | Diseases of the ear and mastoid process                                                             | H60-H95                     | Otorhinolaryngology                     |
| 20  | Mononeuropathies; polyneuropathies and other disorders of the peripheral nervous system             | G56; G57; G58; G59; G60-G64 | Internal medicine, neurology/psychiatry |
| 21  | Diseases of male genital organs                                                                     | N40-N51                     | Urology                                 |

|    |                                                                                                  |                                                                                                   |                                         |
|----|--------------------------------------------------------------------------------------------------|---------------------------------------------------------------------------------------------------|-----------------------------------------|
| 22 | Dermatitis, eczema; melanoma and other malignant neoplasms of skin                               | L20-L30; C43-C44                                                                                  | Dermatology, surgery                    |
| 23 | Noninflammatory disorders of female genital tract                                                | N80-N98                                                                                           | Gynecology                              |
| 24 | Other disorders of the skin and subcutaneous tissue                                              | L80-L99                                                                                           | Dermatology                             |
| 25 | Extrapyramidal and movement disorders                                                            | G20-G26                                                                                           | Internal medicine, neurology/psychiatry |
| 26 | Mental and behavioral disorders due to psychoactive substance use                                | F10-F19                                                                                           | Neurology/psychiatry                    |
| 27 | Cerebral palsy and other paralytic syndromes                                                     | G80-G83                                                                                           | Internal medicine, neurology/psychiatry |
| 28 | Obesity and other hyperalimentation; Malnutrition                                                | E65-E68; E40-E46                                                                                  | Internal medicine                       |
| 29 | Schizophrenia, schizotypal and delusional disorders; disorders of adult personality and behavior | F20-F29; F60-F69                                                                                  | Neurology/psychiatry                    |
| 30 | Functional impairments                                                                           | U50-U52                                                                                           | Internal medicine, Orthopedics          |
| 31 | Injuries                                                                                         | S00-S09; S10-S19; S20-S29; S30-S39; S40-S49; S50-S59; S60-S69; S70-S79; S80-S89; S90-S99; T08-T14 | Orthopedics, surgery                    |

\*Due to the availability of data, dentistry had to be analyzed separately and is therefore not presented.

Descriptive analyses are conducted in two steps. First, the prevalence of each single disease category in 2015 is determined among the groups of nursing home residents, community-dwelling elderly in need for long-term care and community-dwelling elderly without need for long-term care. Second, for the 45 combinations of disease categories and related medical specialties, the proportion of prevalent cases with an outpatient visit in the related medical specialty in 2015 is calculated among the three groups (i.e. nursing home residents as well as community-dwelling elderly with and without need for long-term care). Lower proportions of prevalent cases with an outpatient visit in the related medical specialty may indicate, but not prove, unmet medical care needs.

Poisson regression analyses are conducted to investigate the intensity of medical care for the 45 combinations of disease categories and related medical specialties separately. In cases of overdispersion, negative binomial regression and in cases of excess zeros, zero-inflated Poisson regression or zero-inflated negative binomial regression analyses are conducted. Each regression model includes only those insured persons who are diagnosed in the examined disease category and have valid information on all variables included in the model. The



1  
2  
3 184 dependent variable is the number of outpatient visits in the related medical specialty in 2015.  
4  
5 185 Independent variables are age (in five-year groups), sex and dummy variables as a  
6  
7 186 combination of the obtained level of care (no long-term care dependency, level 1, level 2,  
8  
9 187 level 3 of long-term care dependency) and the care setting (community, nursing home). To  
10  
11 188 take account of differences in morbidity and mortality that likely impact the number of  
12  
13 189 outpatient visits, the remaining 30 disease categories and death are included as control  
14  
15 190 variables. Multicollinearity between variables is evaluated on the basis of the variance  
16  
17 191 inflation factor.  
18  
19  
20  
21  
22

## 23 193 **Step 2: Assessment of nursing home residents**

24 194 The standardized assessment focuses on vision, hearing, oral health and Parkinson's disease.  
25  
26 195 It consists of two parts: First, the individual health status and medical care provision of 500  
27  
28 196 nursing home residents are assessed. Second, the provision of medical care is evaluated for  
29  
30 197 each resident to determine met and unmet medical care needs.  
31  
32 198 Residents are eligible for assessment if a) they are in need for long-term care, b) are aged 60  
33  
34 199 years and over, c) have been residing in a nursing home located in the federal state of Bremen  
35  
36 200 for at least 12 months and d) are a member of the AOK Bremen/Bremerhaven. The total  
37  
38 201 number of eligible nursing home residents is approximately 1,800. The recruitment strategy  
39  
40 202 comprises two stages: At stage one, the total number of nursing homes located in the federal  
41  
42 203 state of Bremen is approached for participation by the research team (i.e. no sampling strategy  
43  
44 204 is applied). At stage two, all eligible residents (or their legal guardians) are invited for  
45  
46 205 participation and approached for informed consent by the nursing homes agreeing to  
47  
48 206 participate (i.e. also no sampling strategy is applied). We expect that not all nursing homes  
49  
50 207 and not all nursing home residents agree to participate and assume to reach 25-30% of the  
51  
52 208 approximately 1,800 eligible nursing home residents, resulting in a study population of 500  
53  
54  
55  
56  
57  
58  
59  
60

1  
2  
3 209 nursing home residents. In case of reaching considerably less than 500 participants, the  
4  
5 210 recruitment strategy may be extended to the federal state of Lower Saxony.  
6  
7 211 The standardized assessment is carried out by trained study nurses and includes: (1)  
8  
9 212 examinations of residents, (2) self-assessments by residents, (3) proxy-assessments by  
10  
11 213 residents' care nurses and (4) reviews of nursing records (table 2). The examination of  
12  
13 214 residents comprises the application of a visual test,[21] a whispered voice test[22] and the  
14  
15 215 Oral Health Assessment Tool (OHAT).[23] During the self-assessments, nursing home  
16  
17 216 residents are asked, inter alia, to rate their vision, hearing and oral health as well as whether  
18  
19 217 they use a visual aid, a hearing device or dentures. Further questions relate to their general  
20  
21 218 health status. The residents' self-assessments are complemented by the proxy-assessments in  
22  
23 219 which the residents' care nurses are asked the same or comparable questions. Information  
24  
25 220 regarding the utilization of medical care (e.g. contacts to general and specialized care),  
26  
27 221 sociodemographic data and nursing home characteristics are obtained from the residents' care  
28  
29 222 nurses and nursing records.  
30  
31  
32  
33 223  
34  
35 224  
36  
37 225  
38  
39 226  
40  
41 227  
42  
43 228  
44  
45 229  
46  
47 230  
48  
49 231  
50  
51 232  
52  
53 233  
54  
55 234  
56  
57  
58  
59  
60

235 **Table 2 Instruments used to assess cross-sectional data in step 2**

| Category                        | Instrument                                                                                                                                                                                                                               | Source* |   |   |   |
|---------------------------------|------------------------------------------------------------------------------------------------------------------------------------------------------------------------------------------------------------------------------------------|---------|---|---|---|
|                                 |                                                                                                                                                                                                                                          | E       | S | P | R |
| <b>Area of medical care</b>     |                                                                                                                                                                                                                                          |         |   |   |   |
| Vision                          | Visual test[21]                                                                                                                                                                                                                          | X       |   |   |   |
|                                 | Questionnaire for individual rating of vision and use of visual aids                                                                                                                                                                     |         | X | X |   |
|                                 | Review of nursing records in terms of vision-related diagnoses (e.g. age-related macular degeneration, cataract) and relevant comorbidities (e.g. diabetes mellitus)                                                                     |         |   |   | X |
| Hearing                         | Whispered voice test[22]                                                                                                                                                                                                                 | X       |   |   |   |
|                                 | Questionnaire for individual rating of hearing and use of hearing devices                                                                                                                                                                |         | X | X |   |
|                                 | Review of nursing records in terms of hearing-related diagnoses (e.g. presbycusis)                                                                                                                                                       |         |   |   | X |
| Oral health                     | Oral Health Assessment Tool (OHAT)[23]                                                                                                                                                                                                   | X       |   |   |   |
|                                 | Oral Health Impact Profile (OHIP)[24]                                                                                                                                                                                                    |         | X |   |   |
|                                 | Questionnaire for individual rating of dental problems as well as availability and use of dentures                                                                                                                                       |         | X | X |   |
|                                 | Review of nursing records in terms of oral health-related diagnoses (e.g. gingivitis)                                                                                                                                                    |         |   |   | X |
| Parkinson's disease             | Review of nursing records in terms of diagnosis of Parkinson's disease, prescribed medications and contacts to medical specialists (e.g. neurologists) and/or therapists (e.g. physiotherapists)                                         |         |   |   | X |
| <b>General health status</b>    |                                                                                                                                                                                                                                          |         |   |   |   |
| Health-related quality of life  | Short-Form Health Survey (SF-12)[25]                                                                                                                                                                                                     |         | X | X |   |
| Depression                      | Geriatric Depression Scale (GDS)[26,27]                                                                                                                                                                                                  |         | X |   |   |
|                                 | Cornell Scale for Depression in Dementia (CSDD)[28]                                                                                                                                                                                      |         |   | X |   |
| Functional and cognitive status | Mini-Mental State Examination[29]                                                                                                                                                                                                        |         | X |   |   |
|                                 | Extended Barthel-Index[30]                                                                                                                                                                                                               |         |   | X |   |
| Nutrition                       | Mini-Nutritional Assessment Short Form (MNA-SF)[31-34]                                                                                                                                                                                   |         |   | X |   |
| Vital signs                     | Review of nursing records in terms of vital signs and falls                                                                                                                                                                              |         |   |   | X |
| Level of care                   | Review of nursing records in terms of level of care                                                                                                                                                                                      |         |   |   | X |
| <b>Additional data</b>          |                                                                                                                                                                                                                                          |         |   |   |   |
| Utilization of medical care     | Questionnaire for and review of nursing records in terms of diagnoses, prescriptions of medication and aids, contacts to and organization of general and specialized care, hospitalization, contacts to duty doctors and emergency calls |         |   | X | X |
| Sociodemographic data           | Questionnaire for and review of nursing records in terms of age, sex, education, marital status, migrant status and relatives                                                                                                            |         |   | X | X |
| Nursing home characteristics    | Questionnaire** for size, number of employees and residents, location-related information                                                                                                                                                |         |   |   | X |

\*E = examinations of residents; S = self-assessed by residents; P = proxy-assessed by residents' care nurses; R = reviewed in nursing records

\*\* This questionnaire is completed by administrative employees of the respective nursing home.

1  
2  
3 240 Additionally, health-related aspects (e.g. quality of life and depression) are assessed as well as  
4  
5 241 structural factors relating to the participating nursing homes (e.g. numbers of employees and  
6  
7 242 residents) that may act as explanatory variables of medical care.

8  
9  
10 243 The assessed data are summarized in individual case reports. These case reports comprise  
11  
12 244 information on age, sex, level of care, date of nursing home admission, in- and outpatient  
13  
14 245 medical care, diagnoses, medication, aids, vital signs, falls, the result of the visual test and  
15  
16 246 self-reported use of visual aids, the result of the whispered voice test and self-reported use of  
17  
18 247 hearing devices, all data of the OHAT, the self- and proxy-assessed oral health, the proxy-  
19  
20 248 assessed availability and use of dentures as well as the result of the Oral Health Impact Profile  
21  
22 249 (OHIP).[24] Moreover, the case reports include the results of the instruments applied for  
23  
24 250 assessing the health-related quality of life,[25] depression,[26-28] functional and cognitive  
25  
26 251 status,[29,30] nutrition,[31-34] as well as all comments made by the trained study nurses  
27  
28 252 during the assessment. Based on the case reports (in printed form), a geriatrician and a GP  
29  
30 253 jointly determine case by case whether or not medical care needs in the areas of vision,  
31  
32 254 hearing, oral health and Parkinson's disease are met, i.e. whether or not the provision of  
33  
34 255 medical care is appropriate. In cases of uncertainties or discrepancies, geriatricians and GPs  
35  
36 256 may access all assessed data (in digital form) and decide to consult a medical specialist of the  
37  
38 257 corresponding field (i.e. an ophthalmologist, an ear, nose and throat (ENT) specialist, a dentist  
39  
40 258 or a neurologist) who independently determines whether or not medical care needs in the  
41  
42 259 respective area are met. Based on these data, the prevalence of met and unmet medical care  
43  
44 260 needs is quantified for each area. The process of evaluating met and unmet medical care needs  
45  
46 261 is based on standardized guidelines and is tested and adjusted before final application. All  
47  
48 262 physicians are trained on how to evaluate met and unmet medical care needs. Intercoder  
49  
50 263 reliability is assessed for a subsample of 50 nursing home residents.

51  
52  
53  
54  
55  
56  
57  
58  
59  
60

### 265 **Step 3: Expert interviews and case conferences**

1  
2  
3 266 Semi-structured expert interviews and case conferences are used to identify structural and  
4  
5 267 case-specific explanations of inappropriate medical care provision in nursing homes. Expert  
6  
7 268 interviews are conducted with nursing home staff, physicians, people in need for long-term  
8  
9  
10 269 care and informal caregivers who provide informed consent. The number of interviews is  
11  
12 270 determined by the principal of theoretical saturation. All interviews are recorded on tape,  
13  
14 271 transcribed and analyzed using content analysis.[35] The results provide a framework for the  
15  
16 272 subsequent case conferences, which are conducted for a selected subsample of nursing home  
17  
18 273 residents assessed in step 2.

21 274 The case conferences are held with the consenting nurses and, where necessary, the  
22  
23 275 consenting physicians and other health professionals involved in the provision of nursing and  
24  
25 276 medical care of the respective resident. Twenty residents with appropriate medical care and  
26  
27 277 twenty residents with inappropriate medical care are randomly selected for each field of  
28  
29 278 medical care (i.e. vision, hearing, oral health and Parkinson's disease). The case conferences  
30  
31 279 are based on a summarized presentation of the health status and medical care provision of the  
32  
33 280 respective resident. Using problem-centered group interviews,[36] the conference members  
34  
35 281 then discuss, case by case, factors that foster or inhibit the provision of needs-based medical  
36  
37 282 care.

41  
42 283

#### 44 284 **Step 4: Analysis of linked data, non-response analysis and extrapolation**

46 285 In step 4, primary data of the 500 nursing home residents assessed in step 2 and SHI claims  
47  
48 286 data covering the years 2014-2018 are linked at the individual level. The linked data are  
49  
50 287 analyzed to identify generalizable factors that impact the provision of medical care:  
51  
52 288 First, retrospective and prospective regression analyses are conducted. Retrospective analyses  
53  
54 289 are used to identify factors in the utilization of medical care that impact the quantified met  
55  
56 290 and unmet medical care needs of nursing home residents. Prospective analyses are used to  
57  
58  
59  
60

1  
2  
3 291 investigate the impact of the standardized assessment conducted in step 2 on the utilization of  
4  
5 292 medical care.

6  
7 293 Next, a non-response analysis is conducted. SHI claims data of 500 responders and 1,300 non-  
8  
9  
10 294 responders are analyzed to identify systematic differences between responders and non-  
11  
12 295 responders. Chi-square tests are used to identify differences in the distribution of age groups,  
13  
14 296 sex, morbidity and long-term care levels. Differences in the mean duration of stays in long-  
15  
16 297 term care and nursing homes are identified using t-tests for normally distributed variables and  
17  
18 298 Wilcoxon-Mann-Whitney tests for non-normal distributions.

19  
20  
21 299 Third, prevalence of met and unmet medical care needs determined in step 2 is extrapolated.  
22  
23 300 Controlling for systematic differences between responders and non-responders identified in  
24  
25 301 the non-response analysis, prevalence of met and unmet medical care needs in the areas of  
26  
27 302 vision, hearing, oral health and Parkinson's disease is projected to all nursing home residents  
28  
29 303 insured by the AOK Bremen/Bremerhaven. Using official statistics, systematic differences in  
30  
31 304 the distribution of age groups, sex and long-term care levels between nursing home residents  
32  
33 305 insured by the AOK Bremen/Bremerhaven and the total population of nursing home residents  
34  
35 306 in the federal state of Bremen are identified. Taking into account identified differences, the  
36  
37 307 prevalence of met and unmet medical care needs is then projected to all nursing home  
38  
39 308 residents of Bremen. Finally, the prevalence is projected to all nursing home residents of  
40  
41 309 Germany controlling for identifiable differences in the distribution of age groups, sex and  
42  
43 310 long-term care levels between nursing home residents in Bremen and Germany.

44  
45  
46  
47  
48  
49 311  
50  
51 312 **Step 5: Modified Delphi study and pilot projects**  
52  
53 313 Based on the factors identified that may explain inappropriate medical care in steps 3 and 4, a  
54  
55 314 modified Delphi study is then carried out. The technique is used with stakeholders from the  
56  
57 315 fields of nursing and medical care and comprises three rounds. The first round is based on  
58  
59 316 face-to-face focus group discussions, while the second and third rounds each consist of a

1  
2  
3 317 semi-structured online survey. Each survey takes about 20 minutes to complete and is online  
4  
5 318 for up to 2 weeks.

6  
7 319 In the first round, a convenience sample of at least two homogeneous and two heterogeneous  
8  
9  
10 320 focus groups of four to six participating stakeholders (i.e., nursing home staff, GPs, medical  
11  
12 321 specialist, SHI employees, nursing home residents and relatives) generate ideas on how  
13  
14 322 medical care provision to nursing home residents can be improved. The focus groups are led  
15  
16  
17 323 by two experienced project researchers, who feed the results of steps 3 and 4 into the  
18  
19 324 discussions. All focus group discussions are recorded, summarized and discussed within the  
20  
21 325 research team. Based on the results, the project researchers draft at least two potential pilot  
22  
23 326 projects.

24  
25  
26 327 In round two, the experts of the first round are given descriptions of the potential pilot  
27  
28 328 projects. They rate and comment on the proposed pilot projects with respect to their feasibility  
29  
30 329 and effectiveness for improving medical care of nursing home residents. These ratings are  
31  
32 330 narratively and visually summarized.

33  
34  
35 331 In the third round, the same experts re-rate the projects based on the summarized ratings from  
36  
37 332 the previous round. The re-ratings are summarized using the same method as in round two.  
38  
39 333 Taking the results of this last round into account, the concept of the pilot projects is revised.  
40  
41  
42 334 This is expected to result in a more consensual decision. At least two pilot projects are  
43  
44 335 implemented simultaneously in one nursing home to test for practicability. To minimize the  
45  
46 336 risk of contamination effects, the pilot projects are implemented in different areas of the  
47  
48 337 nursing home. A systematic evaluation of the pilot projects is planned in a follow-up study.

49  
50  
51 338

### 52 53 339 **Patient and public involvement**

54  
55  
56 340 Nursing home residents and the public were not involved in the development of the research  
57  
58 341 questions and outcome measures as well as in the design of and the recruitment to the study.  
59  
60 342 Nursing home residents are involved in the standardized assessments of vision, hearing, oral

1  
2  
3 343 health, health-related quality of life, depression as well as functional and cognitive status  
4  
5 344 (self-assessments). Furthermore, nursing home residents and relatives are involved in the  
6  
7 345 expert interviews, the modified Delphi study and the development of pilot projects. The  
8  
9  
10 346 results of the standardized assessment are summarized and disseminated to the participating  
11  
12 347 nursing homes (i.e. the results are not directly disseminated to the participating residents). The  
13  
14 348 results of the expert interviews, the modified Delphi study and the development of pilot  
15  
16 349 projects are disseminated to the participating nursing home residents and relatives.  
17  
18  
19 350

## 21 351 **Discussion**

23  
24 352 This mixed-methods study broadens the limited evidence on the needs-based provision of  
25  
26 353 medical care in nursing homes. It systematically assesses, evaluates and explains met and  
27  
28 354 unmet medical care needs in nursing homes and takes first steps toward improvement.  
29  
30 355 Up to now, several studies have described differences in the utilization of medical care  
31  
32 356 between nursing home residents and community-dwelling elderly with and without need for  
33  
34 357 long-term care.[2,37-39] None of these, however, has evaluated whether such differences  
35  
36 358 reflect unmet medical care needs at the individual level. Neither have differences in the  
37  
38 359 utilization of medical care been explained by prevailing structures that may be changed.  
39  
40 360 The present mixed-methods study addresses this evidence gap: Based on longitudinal SHI  
41  
42 361 claims data, cross-sectional data collected in nursing homes as well as transcripts of expert  
43  
44 362 interviews and case conferences, differences in the utilization of medical care are identified,  
45  
46 363 met and unmet medical care needs are quantified, explanations of inappropriate provision of  
47  
48 364 medical care are provided and pilot projects are developed aiming to improve the provision of  
49  
50 365 medical care where it is found to be inappropriate. Participatory approaches involve GPs,  
51  
52 366 medical specialists, nursing home staff, SHI employees, nursing home residents and relatives.  
53  
54 367 This is expected to result in strong acceptance and effective pilot projects which will be  
55  
56 368 systematically evaluated in a follow-up study.  
57  
58  
59  
60



1  
2  
3 369 There are, however, some limitations to consider. First, in the present study, all nursing homes  
4  
5 370 in the federal state of Bremen are invited to participate and to recruit nursing home residents  
6  
7 371 for study participation. Differences in the willingness to participate among nursing homes and  
8  
9 372 nursing home residents may result in a selective study population. The claims-based non-  
10  
11 373 response analysis, however, permits the identification of structural differences between  
12  
13 374 participants and non-participants. Second, the study focuses on nursing homes located in the  
14  
15 375 federal state of Bremen and members of one local SHI fund. Therefore, the generalizability of  
16  
17 376 research findings may be limited.

18  
19 377 In conclusion, the findings from this study enhance our knowledge of met and unmet medical  
20  
21 378 care needs in nursing homes. The pilot projects provide a first step towards a sustainable  
22  
23 379 improvement of medical care in German nursing homes. Therefore, it is expected that the  
24  
25 380 findings are highly relevant for many stakeholders from the fields of nursing and medical  
26  
27 381 care.

28  
29  
30  
31  
32  
33 382

### 34 35 383 **Ethics and dissemination**

36  
37 384 The Ethics Committee of the University of Bremen approved this study on November 23,  
38  
39 385 2017. All eligible nursing home residents and all nursing home staff are informed in detail  
40  
41 386 about the study. Informed consent is obtained from all included nursing home residents (or  
42  
43 387 their legal guardians where applicable). Informed consent is also obtained from all persons  
44  
45 388 included in the expert interviews, case conferences and Delphi study. Dissemination strategies  
46  
47 389 include presentations at national and international conferences and publications in peer-  
48  
49 390 reviewed scientific journals.

50  
51  
52  
53  
54 391  
55  
56  
57  
58  
59  
60

## 392 **Acknowledgements**

393 We are grateful to the AOK Bremen/Bremerhaven for the provision of longitudinal SHI  
394 claims data as well as to the Bremer Heimstiftung, the Bundesverband privater Anbieter  
395 sozialer Dienste e.V., the LandesArbeitsGemeinschaft der Freien Wohlfahrtspflege Bremen  
396 e.V. and the Hausärzteverband Bremen for their cooperation. Furthermore, we are grateful to  
397 the participating nursing homes, nursing home residents, physicians, relatives, study nurses,  
398 student assistants and Statutory Health Insurance employees as well as to Vicki May for  
399 proofreading this protocol.

400

## 401 **Footnotes**

402 **Contributors:** JC, TK, ASchw, GS, KW-O, AG and HR designed the study. MS, TK, CT,  
403 ASchw and HR specified the analysis of longitudinal SHI claims data. MS, FH, DG, ASchm,  
404 SK, GS, KW-O, AG and HR specified the collection of cross-sectional primary data. JC, MS,  
405 FH, DG, ASchm, CT, ASchw and SK wrote the first draft of the protocol which was critically  
406 revised by TK, GS, KW-O, AG and HR. All authors approved the final version of the  
407 protocol.

408 **Funding:** This work was supported by the Innovation Committee at the Federal Joint  
409 Committee (grant number 01VSF16039).

410 **Competing interests:** None declared.

411

## 412 **Figures**

413 See separate file (Figure\_1.jpg)

414 **Figure 1 Conceptual framework of the mixed-methods study**

415

416

1  
2  
3 417 **References**  
4

- 5  
6 418 1 Iliffe S, Davies SL, Gordon AL, et al. Provision of NHS generalist and specialist services to  
7  
8 419 care homes in England: review of surveys. *Prim Health Care Res Dev* 2016;17(2):122-37.  
9  
10 420 2 Balzer K, Butz S, Bentzel J, et al. Medical specialist attendance in nursing homes. *GMS*  
11  
12 421 *Health Technol Assess* 2013;9:Doc02.  
13  
14  
15 422 3 Burns E, Nair S. New horizons in care home medicine. *Age Ageing* 2014;43(1):2-7.  
16  
17 423 4 Briggs R, Holmerová I, Martin FC, et al. Towards standards of medical care for physicians  
18  
19 424 in nursing homes. *Eur Geriatr Med* 2015;6(4):401-3.  
20  
21 425 5 Gordon AL, Franklin M, Bradshaw L, et al. Health status of UK care home residents: a  
22  
23 426 cohort study. *Age Ageing* 2014;43(1):97-103.  
24  
25  
26 427 6 Björk S, Juthberg C, Lindkvist M, et al. Exploring the prevalence and variance of cognitive  
27  
28 428 impairment, pain, neuropsychiatric symptoms and ADL dependency among persons living in  
29  
30 429 nursing homes; a cross-sectional study. *BMC Geriatr* 2016;16:154.  
31  
32  
33 430 7 Tolson D, Rolland Y, Andrieu S, et al. International Association of Gerontology and  
34  
35 431 Geriatrics: a global agenda for clinical research and quality of care in nursing homes. *J Am*  
36  
37 432 *Med Dir Assoc* 2011;12(3):184-9.  
38  
39  
40 433 8 Thibault L, Kergoat H. Eye care services for older institutionalised individuals affected by  
41  
42 434 cognitive and visual deficits: a systematic review. *Ophthalmic Physiol Opt* 2016;36(5):566-  
43  
44 435 83.  
45  
46  
47 436 9 Yamada Y, Vlachova M, Richter T, et al. Prevalence and correlates of hearing and visual  
48  
49 437 impairments in European nursing homes: results from the SHELTER study. *J Am Med Dir*  
50  
51 438 *Assoc* 2014;15(10):738-43.  
52  
53  
54 439 10 Cohen-Mansfield J, Infeld DL. Hearing aids for nursing home residents: current policy and  
55  
56 440 future needs. *Health Policy* 2006;79(1):49-56.  
57  
58  
59  
60

- 1  
2  
3 441 11 Zenthöfer A, Rammelsberg P, Cabrera T, et al. Increasing dependency of older people in  
4  
5 442 nursing homes is associated with need for dental treatments. *Neuropsychiatr Dis Treat*  
6  
7 443 2014;10:2285-90.  
8  
9  
10 444 12 Müller F, Naharro M, Carlsson GE. What are the prevalence and incidence of tooth loss in  
11  
12 445 the adult and elderly population in Europe? *Clin Oral Impl Res* 2007;18 Suppl 3:2-14.  
13  
14 446 13 Lukas A, Mayer B, Onder G, et al. [Pain therapy in German long-term care facilities in a  
15  
16 447 European comparison. Results of the SHELTER study]. *Schmerz* 2015;29(4):411-21.  
17  
18 448 14 Storms H, Marquet K, Aertgeerts B, et al. Prevalence of inappropriate medication use in  
19  
20 449 residential long-term care facilities for the elderly: a systematic review. *Eur J Gen Pract*  
21  
22 450 2017;23(1):69-77.  
23  
24 451 15 Dörks M, Allers K, Schmiemann G, et al. Inappropriate medication in non-hospitalized  
25  
26 452 patients with renal insufficiency: a systematic review. *J Am Geriatr Soc* 2017;65(4):853-62.  
27  
28 453 16 Morin L, Laroche ML, Texier G, et al. Prevalence of potentially inappropriate medication  
29  
30 454 use in older adults living in nursing homes: a systematic review. *J Am Med Dir Assoc*  
31  
32 455 2016;17(9):862.e1-9.  
33  
34 456 17 Johnell K. Inappropriate drug use in people with cognitive impairment and dementia: a  
35  
36 457 systematic review. *Curr Clin Pharmacol* 2015;10(3):178-84.  
37  
38 458 18 Atramont A, Bourdel-Marchasson I, Bonnet-Zamponi D, et al. Impact of nursing home  
39  
40 459 admission on health care use and disease status elderly dependent people one year before and  
41  
42 460 one year after skilled nursing home admission based on 2012-2013 SNIIRAM data. *BMC*  
43  
44 461 *Health Serv Res* 2017;17(1):667.  
45  
46 462 19 Atramont A, Bonnet-Zamponi D, Bourdel-Marchasson I, et al. Health status and drug use  
47  
48 463 1 year before and 1 year after skilled nursing home admission during the first quarter of 2013  
49  
50 464 in France: a study based on the French National Health Insurance Information System. *Eur J*  
51  
52 465 *Clin Pharmacol*. 2018;74(1):109-18.  
53  
54  
55  
56  
57  
58  
59  
60

- 1  
2  
3 466 20 Gemeinsamer Bundesausschuss. The Federal Joint Committee. <https://www.g->  
4  
5 467 [ba.de/downloads/17-98-2804/2018-12-04\\_G-](https://www.g-ba.de/downloads/17-98-2804/2018-12-04_G-)  
6  
7 468 [BA\\_Flyer\\_Der\\_Gemeinsame\\_Bundesausschuss\\_EN\\_bf.pdf](#) (accessed April 22, 2019).  
8  
9  
10 469 21 Bailey IL, Lovie JE. New design principles for visual acuity letter charts. *Am J Optom*  
11  
12 470 *Physiol Opt* 1976;53(11):740-5.  
13  
14 471 22 Macphee GJ, Crowther JA, McAlpine CH. A simple screening test for hearing impairment  
15  
16 472 in elderly patients. *Age Ageing* 1988;17(5):347-51.  
17  
18 473 23 Chalmers JM, King PL, Spencer AJ, et al. The Oral Health Assessment Tool--validity and  
19  
20 474 reliability. *Aust Dent J* 2005;50(3):191-9.  
21  
22  
23 475 24 John MT, Miglioretti DL, LeResche L, et al. German short forms of the Oral Health  
24  
25 476 Impact Profile. *Community Dent Oral Epidemiol* 2006;34(4):277-88.  
26  
27  
28 477 25 Morfeld M, Kirchberger I, Bullinger M. SF-36. Fragebogen zum Gesundheitszustand:  
29  
30 478 Deutsche Version des Short Form - 36 Health Survey. Göttingen: Hogrefe; 2011.  
31  
32  
33 479 26 Yesavage JA, Brink TL, Rose TL, et al. Development and validation of a geriatric  
34  
35 480 depression screening scale: a preliminary report. *J Psychiatr Res* 1982;17(1):37-49.  
36  
37  
38 481 27 Allgaier AK, Kramer D, Mergl R, et al. [Validity of the geriatric depression scale in  
39  
40 482 nursing home residents: comparison of GDS-15, GDS-8, and GDS-4]. *Psychiatrische Praxis*  
41  
42 483 2011;38(6):280-6.  
43  
44  
45 484 28 Alexopoulos GS, Abrams RC, Young RC, et al. Cornell Scale for Depression in Dementia.  
46  
47 485 *Biol Psychiatry* 1988;23(3):271-84.  
48  
49 486 29 Folstein MF, Folstein SE, McHugh PR. "Mini-mental state". A practical method for  
50  
51 487 grading the cognitive state of patients for the clinician. *J Psychiatr Res* 1975;12(3):189-98.  
52  
53  
54 488 30 Prosiegel M, Böttger S, Schenk T, et al. Der Erweiterte Barthel-Index (EBI) - eine neue  
55  
56 489 Skala zur Erfassung von Fähigkeitsstörungen bei neurologischen Patienten. *Neurol Rehabil*  
57  
58 490 1996;2:7-13.  
59  
60

- 1  
2  
3 491 31 Rubenstein LZ, Harker JO, Salvà A, et al. Screening for undernutrition in geriatric  
4  
5 492 practice: developing the short-form mini-nutritional assessment (MNA-SF). *J Gerontol A Biol*  
6  
7 493 *Sci Med Sci* 2001;56(6):M366-72.
- 8  
9  
10 494 32 Vellas B, Villars H, Abellan G, et al. Overview of the MNA--Its history and challenges. *J*  
11  
12 495 *Nutr Health Aging* 2006;10(6):456-63; discussion 463-5.
- 13  
14 496 33 Guigoz Y. The Mini Nutritional Assessment (MNA) review of the literature--What does it  
15  
16 497 tell us? *J Nutr Health Aging* 2006;10(6):466-85; discussion 485-7.
- 17  
18  
19 498 34 Kaiser MJ, Bauer JM, Ramsch C, et al. Validation of the Mini Nutritional Assessment  
20  
21 499 short-form (MNA-SF): a practical tool for identification of nutritional status. *J Nutr Health*  
22  
23 500 *Aging* 2009;13(9):782-8.
- 24  
25  
26 501 35 Kohlbacher F. The use of qualitative content analysis in case study research. *Forum: Qual*  
27  
28 502 *Soc Res* 2006; doi:10.17169/fqs-7.1.75.
- 29  
30  
31 503 36 Witzel A. The problem-centered interview. *Forum: Qual Soc Res* 2000; doi:10.17169/fqs-  
32  
33 504 1.1.1132.
- 34  
35 505 37 Kleina T, Horn A, Suhr R, et al. [Current status of medical care for nursing home residents  
36  
37 506 in Germany - results of an empirical study]. *Gesundheitswesen* 2017;79(5):382-87.
- 38  
39  
40 507 38 Schmiemann G, Herget-Rosenthal S, Hoffmann F. [Medical services for nursing home  
41  
42 508 residents : results of the study on inappropriate medication in patients with renal insufficiency  
43  
44 509 in nursing homes]. *Z Gerontol Geriatr* 2016;49(8):727-33.
- 45  
46  
47 510 39 Pittrow D, Krappweis J, Rentsch A, et al. Pattern of prescriptions issued by nursing home-  
48  
49 511 based physicians versus office-based physicians for frail elderly patients in German nursing  
50  
51 512 homes. *Pharmacoepidemiol Drug Saf* 2003;12(7):595-9.
- 52  
53  
54  
55  
56  
57  
58  
59  
60

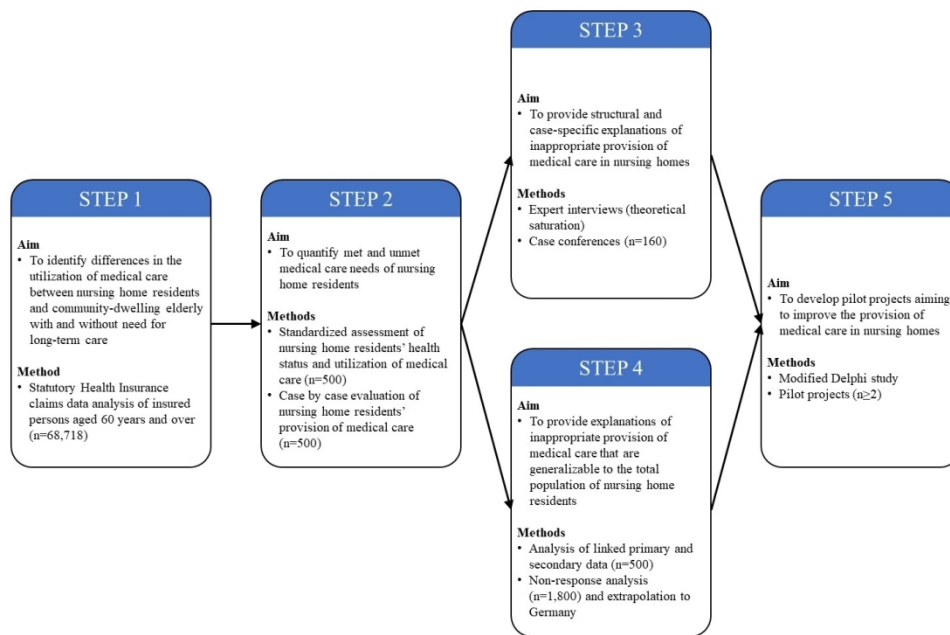

Figure 1 Conceptual framework of the mixed-methods study

128x96mm (300 x 300 DPI)
